# Supplementary material for: Molecular characterization of respiratory syncytial viruses circulating in a paediatric cohort in Amman, Jordan
Source: PubMed Central journal article supplement (PMC8627666; doi:10.1099/mgen.0.000292), 2019-09-18
Supplement: mgen-7-0292-s001.pdf [file mgen-7-0292-s001.pdf]

Spatial regions

- North
  - Central
  - North-East
  - West
- PP < 0.60

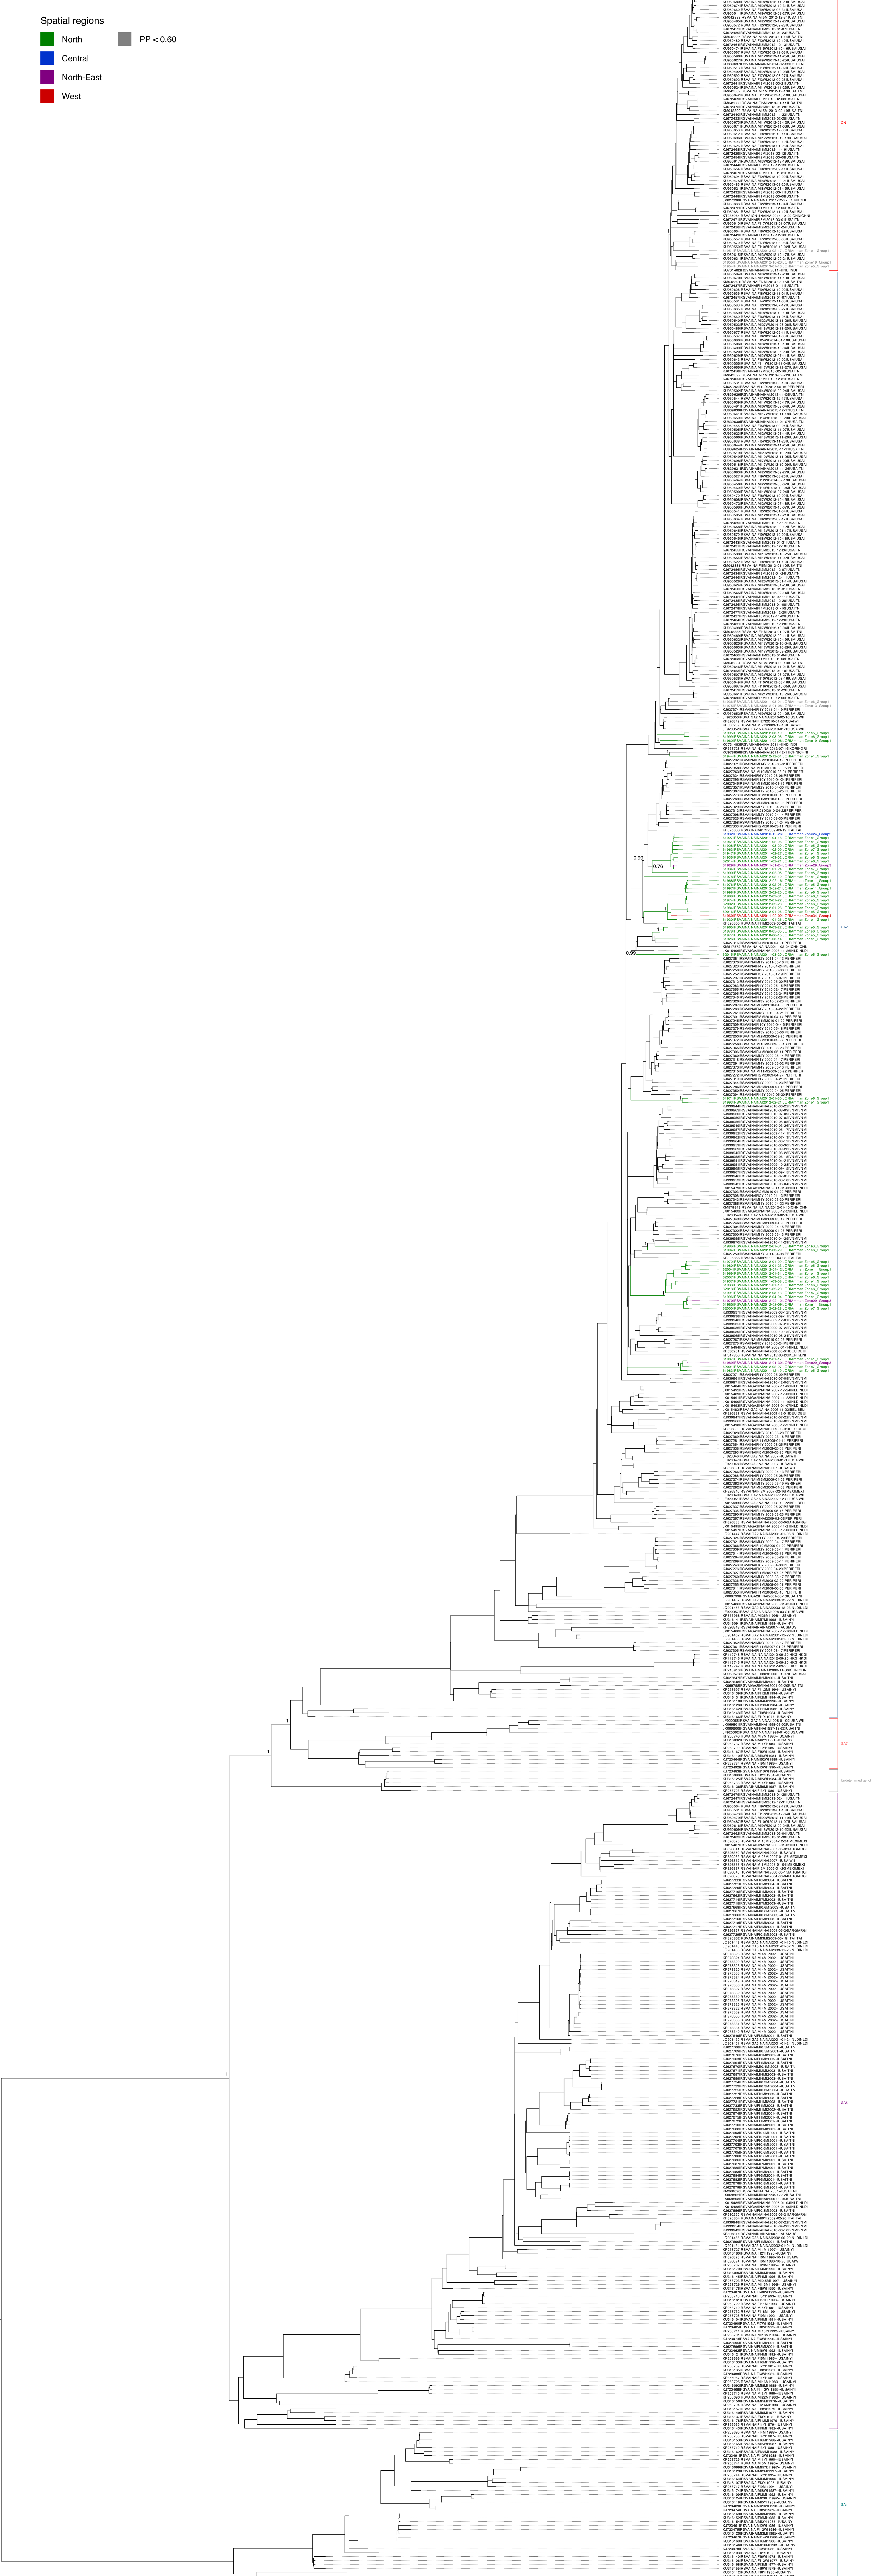

0.99

0.76

0.99

1

1

1

1

1

1

1

1

1

1

1

1

1

1

1

1

1

1

1

1

1

1

1

1

1

1

1

1

1

1

1

1

1

1

1

1

1

1

1

1

1

1

1

1

1

1

1

1

1

1

1

1

1

1

1

1

1

1

1

1

1

1

1

1

1

1

1

1

1

1

1

1

1

1

1

1

1

1

1

1

1

1

1

1

1

1

1

1

1

1

1

1

1

1

1

1

1

1

1

1

1

1

1

1

1

1

1

1

1

1

1

1

1

1

1

1

1

1

1

1

1

1

1

1

1

1

1

1

1

1

1

1

1

1

1

1

1

1

1

1

1

1

1

1

1

1

1

1

1

1

1

1

1

1

1

1

1

1

1

1

1

1

1

1

1

1

1

1

1

1

1

1

1

1

1

1

1

1

1

1

1

1

1

1

1

1

1

1

1

1

1

1

1

1

1

1

1

1

1

1

1

1

1

1

1

1

1

1

1

1

1

1

1

1

1

1

1

1

1

1

1

1

1

1

1

1

1

1

1

1

1

1

1

1

1

1

1

1

1

1

1

1

1

1

1

1

1

1

1

1

1

1

1

1

1

1

1

1

1

1

1

1

1

1

1

1

1

1

1

1

1

1

1

1

1

1

1

1

1

1

1

1

1

1

1

1

1

1

1

1

1

1

1

1

1

1

1

1

1

1

1

1

1

1

1

1

1

1

1

1

1

1

1

1

1

1

1

1

1

1

1

**Supplementary Figure 1. RSVA phylogeny indicates spatial regions.** MCC tree with tip labels colored per spatial region in Amman, Jordan, and annotated with genotype and node support as posterior probability > 0.75.

RSVB

Spatial regions

- North
- Central
- North-West
- PP < 0.40

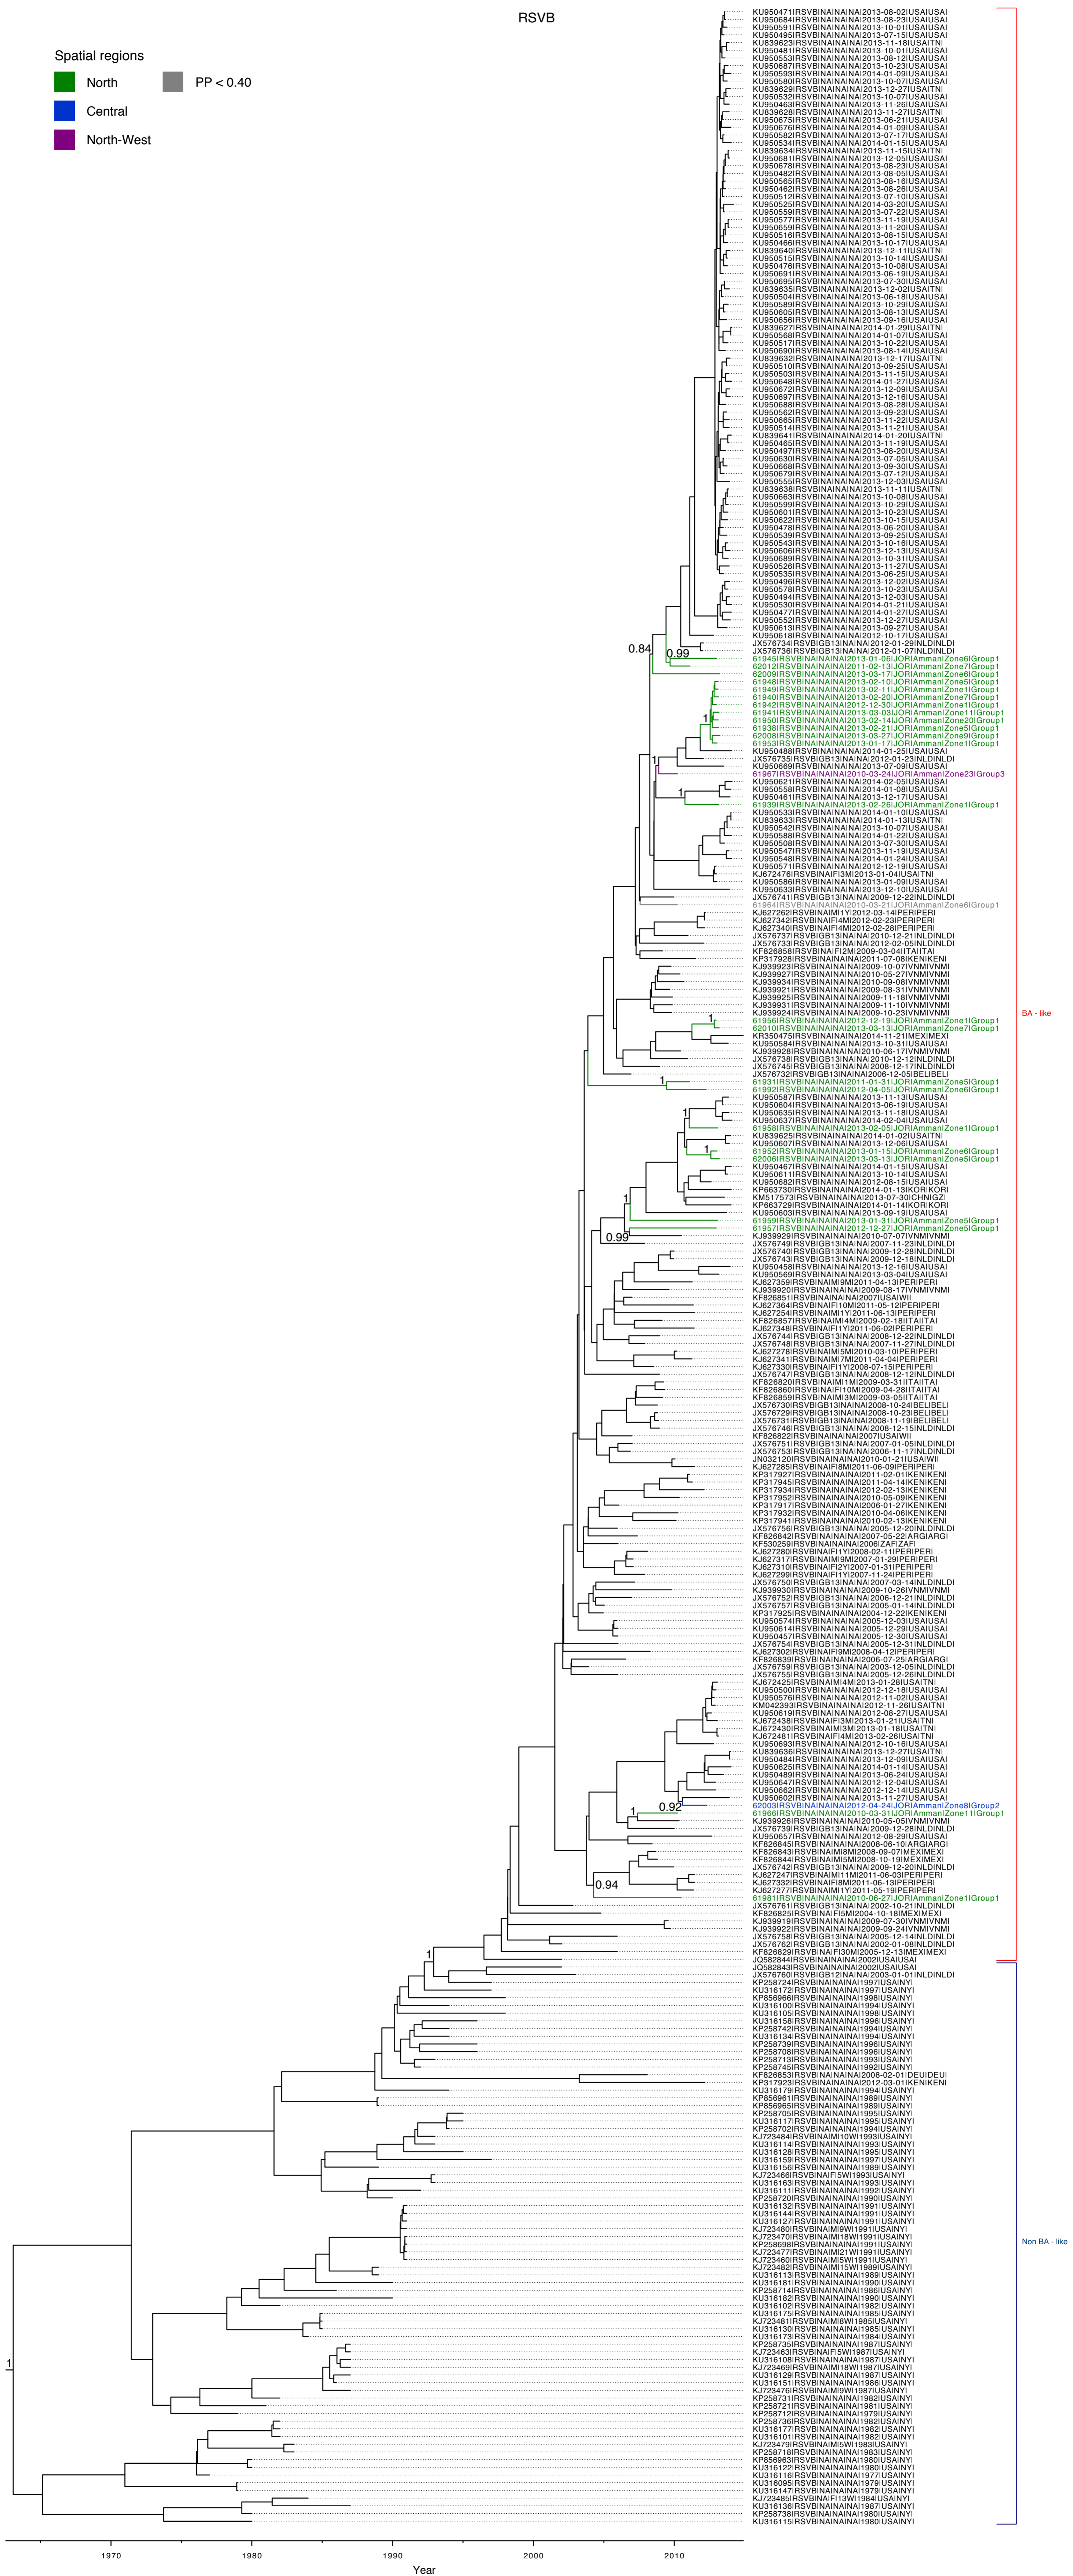

BA-like

Non BA-like

**Supplementary Figure 2. RSVB phylogeny indicates spatial regions.** MCC tree with tip labels colored per spatial region in Amman, Jordan, and annotated with genotype and node support as posterior probability > 0.75.

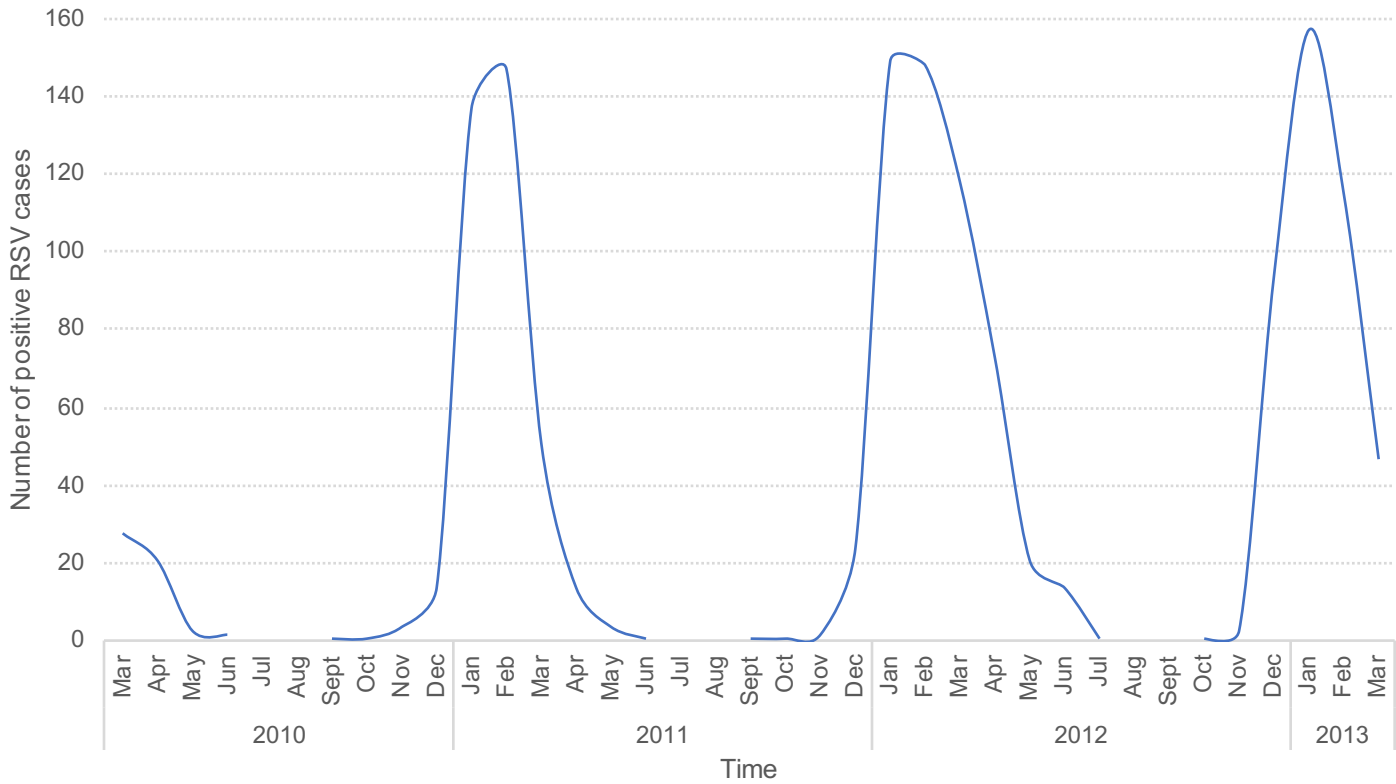

**Supplementary Figure 3. RSV cases in Amman, Jordan.** The distribution of the total number of RSV cases detected over three years by month in Amman, Jordan.

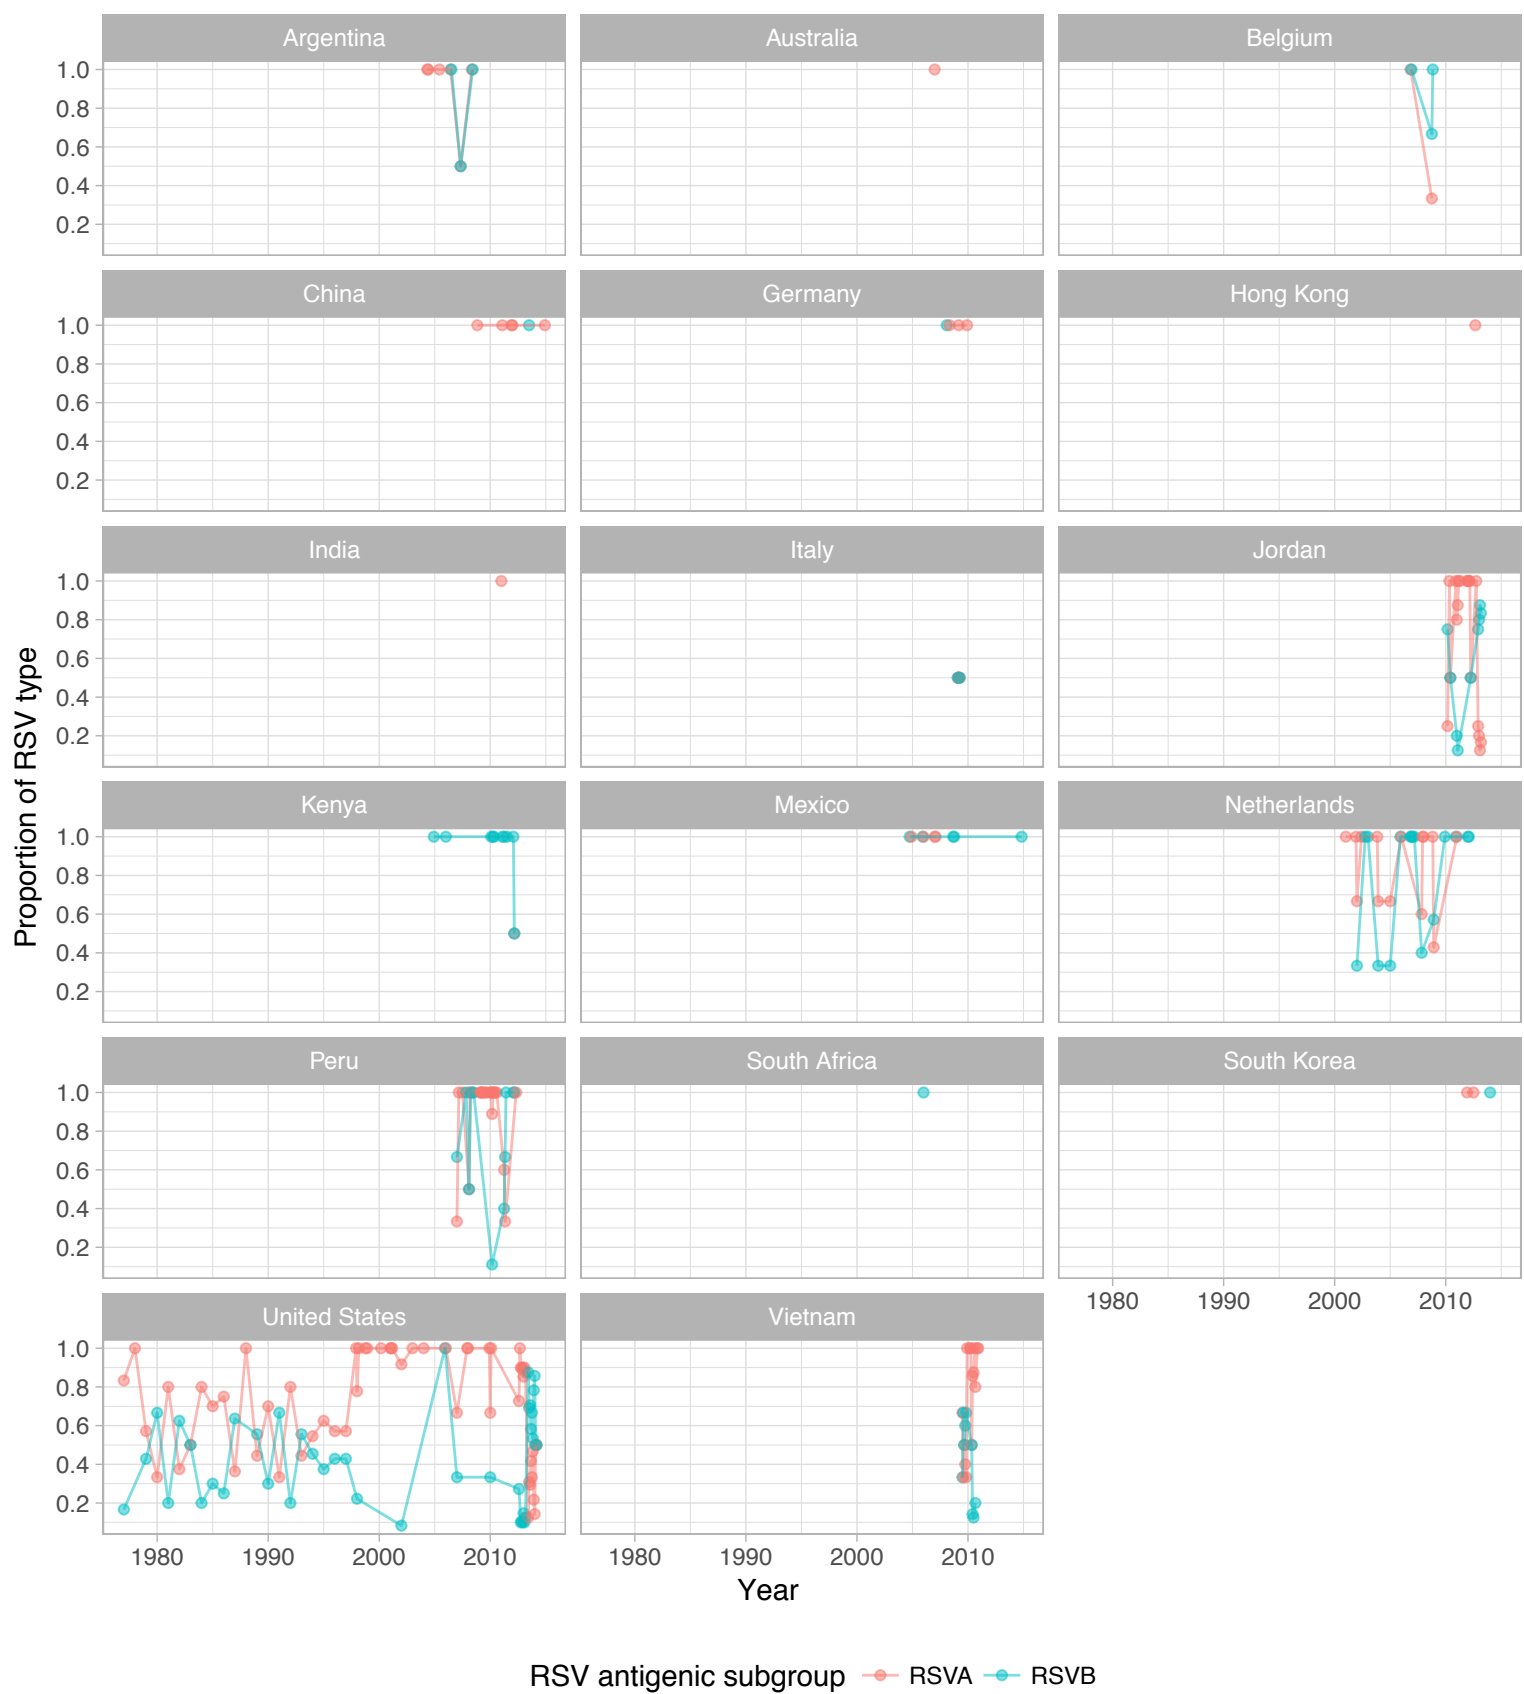

RSV antigenic subgroup — RSV A — RSV B

**Supplementary Figure 4. Circulation of RSV worldwide.** The proportion of all available full-genome RSV sequences from all sampled countries from 1977-2014.



# United States

Proportion of RSV genotypes

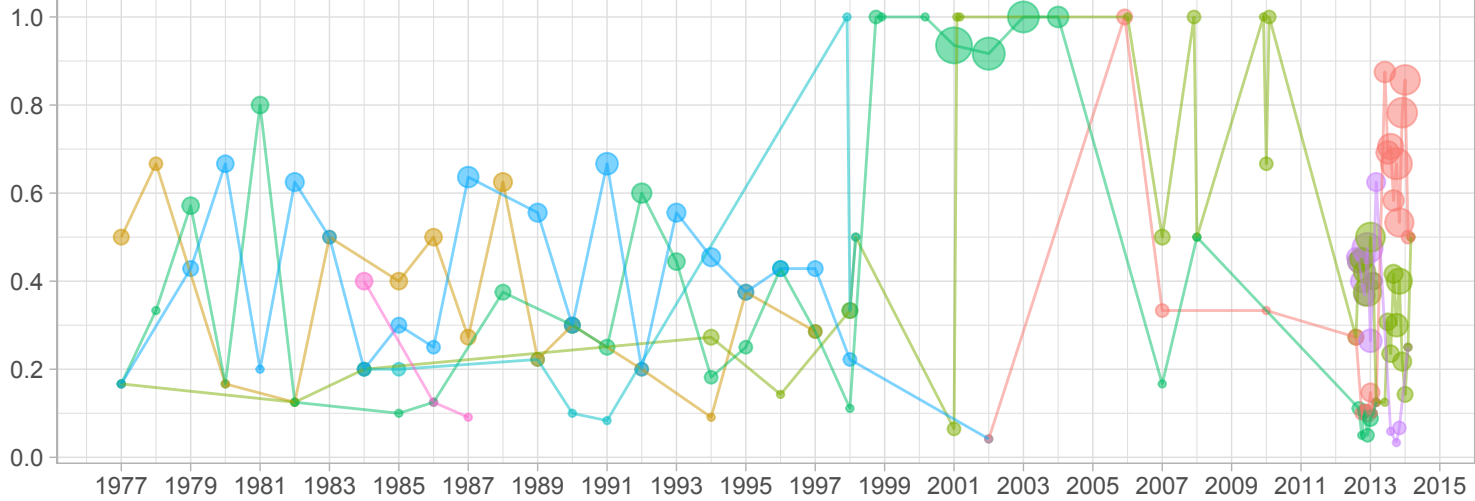

Genotype Count ● 10 ● 20

RSVA genotypes GA1 GA2 GA5 GA7 ON1 Undetermined Genotype  
 RSVB genotypes BA-like Non BA-like

**Supplementary Figure 5. Circulation of RSV genotypes in the United States.** The proportion of all available full-genome RSV sequences aggregated by genotype for the United States from 1977-2014. Circle sizes represent the number of sequences from each genotype contributing for the proportion.

**Supplementary File 1. RSV datasets.** Sequences used in the study annotated with genotype. Jordanian sequences numbered according to introduction.

| Taxa                                      | Genotype | Introduction |
|-------------------------------------------|----------|--------------|
| KJ672451 RSVA NA M 5M 2012-12-27 USA TN   | ON1      | NA           |
| KJ672470 RSVA NA M 3M 2012-12-18 USA TN   | ON1      | NA           |
| KJ672466 RSVA NA M 5M 2012-12-05 USA TN   | ON1      | NA           |
| KJ672424 RSVA NA F 1M 2012-12-27 USA TN   | ON1      | NA           |
| KJ672461 RSVA NA M 4M 2012-12-31 USA TN   | ON1      | NA           |
| KU950509 RSVA NA F 11W 2012-12-11 USA USA | ON1      | NA           |
| KU950680 RSVA NA M 9W 2012-11-29 USA USA  | ON1      | NA           |
| KU950674 RSVA NA M 2W 2012-10-31 USA USA  | ON1      | NA           |
| KU950660 RSVA NA F 9W 2012-08-31 USA USA  | ON1      | NA           |
| KU950511 RSVA NA M 9W 2012-09-27 USA USA  | ON1      | NA           |
| KM042383 RSVA NA M 5M 2012-12-31 USA TN   | ON1      | NA           |
| KU950485 RSVA NA M 2W 2012-12-27 USA USA  | ON1      | NA           |
| KU950572 RSVA NA F 2W 2012-09-28 USA USA  | ON1      | NA           |
| KJ672452 RSVA NA M 1M 2013-01-07 USA TN   | ON1      | NA           |
| KJ672480 RSVA NA M 2M 2013-01-23 USA TN   | ON1      | NA           |
| KM042386 RSVA NA M 5M 2013-01-14 USA TN   | ON1      | NA           |
| KU950480 RSVA NA F 2W 2012-12-10 USA USA  | ON1      | NA           |
| KJ672464 RSVA NA M 3M 2012-12-13 USA TN   | ON1      | NA           |
| KU950474 RSVA NA F 15W 2012-10-16 USA USA | ON1      | NA           |
| KU950567 RSVA NA F 2W 2012-12-03 USA USA  | ON1      | NA           |
| KU950596 RSVA NA M 1W 2013-11-25 USA USA  | ON1      | NA           |
| KU950627 RSVA NA M 9W 2013-10-25 USA USA  | ON1      | NA           |
| KU839637 RSVA NA NA NA 2014-02-03 USA TN  | ON1      | NA           |
| KU950513 RSVA NA F 1W 2012-11-09 USA USA  | ON1      | NA           |
| KU950492 RSVA NA M 2W 2012-10-03 USA USA  | ON1      | NA           |
| KU950592 RSVA NA F 7W 2012-08-27 USA USA  | ON1      | NA           |
| KU950692 RSVA NA F 3W 2012-09-26 USA USA  | ON1      | NA           |
| KJ672441 RSVA NA F 3M 2013-03-21 USA TN   | ON1      | NA           |
| KU950524 RSVA NA M 1W 2012-11-23 USA USA  | ON1      | NA           |
| KM042389 RSVA NA M 1M 2012-12-13 USA TN   | ON1      | NA           |
| KU950642 RSVA NA F 11W 2012-10-10 USA USA | ON1      | NA           |
| KJ672469 RSVA NA F 5M 2013-02-08 USA TN   | ON1      | NA           |
| KM042388 RSVA NA F 5M 2013-01-11 USA TN   | ON1      | NA           |
| KJ672475 RSVA NA M 3M 2013-01-28 USA TN   | ON1      | NA           |
| KM042390 RSVA NA M 5M 2013-02-19 USA TN   | ON1      | NA           |
| KJ672440 RSVA NA M 4M 2012-11-23 USA TN   | ON1      | NA           |

|                                            |     |    |
|--------------------------------------------|-----|----|
| KJ672433 RSVA NA M 1M 2013-02-20 USA TN    | ON1 | NA |
| KU950673 RSVA NA M 1W 2012-09-12 USA USA   | ON1 | NA |
| KU950671 RSVA NA M 1W 2012-11-08 USA USA   | ON1 | NA |
| KU950653 RSVA NA F 8W 2012-12-06 USA USA   | ON1 | NA |
| KU950612 RSVA NA F 9W 2012-10-11 USA USA   | ON1 | NA |
| KU950696 RSVA NA M 12W 2012-12-19 USA USA  | ON1 | NA |
| KU950493 RSVA NA F 9W 2012-09-12 USA USA   | ON1 | NA |
| KU950626 RSVA NA F 9W 2013-01-28 USA USA   | ON1 | NA |
| KJ672468 RSVA NA M 1M 2012-11-19 USA TN    | ON1 | NA |
| KJ672429 RSVA NA F 2M 2013-02-12 USA TN    | ON1 | NA |
| KJ672454 RSVA NA F 2M 2013-03-08 USA TN    | ON1 | NA |
| KU950617 RSVA NA M 3W 2012-12-19 USA USA   | ON1 | NA |
| KJ672444 RSVA NA F 3M 2012-12-13 USA TN    | ON1 | NA |
| KU950654 RSVA NA F 9W 2012-09-11 USA USA   | ON1 | NA |
| KJ672467 RSVA NA F 3M 2013-01-31 USA TN    | ON1 | NA |
| KU950694 RSVA NA F 2W 2012-10-22 USA USA   | ON1 | NA |
| KU950475 RSVA NA M 8W 2012-09-21 USA USA   | ON1 | NA |
| KU950483 RSVA NA F 2W 2013-08-20 USA USA   | ON1 | NA |
| KU950521 RSVA NA M 8W 2012-08-15 USA USA   | ON1 | NA |
| KJ672432 RSVA NA F 3M 2013-03-11 USA TN    | ON1 | NA |
| KJ672448 RSVA NA F 1M 2013-03-08 USA TN    | ON1 | NA |
| JX627336 RSVA NA NA NA 2011-12-27 KOR KOR  | ON1 | NA |
| KU950666 RSVA NA F 2W 2013-11-04 USA USA   | ON1 | NA |
| KJ672472 RSVA NA F 1M 2012-12-05 USA TN    | ON1 | NA |
| KU950651 RSVA NA F 2W 2012-11-12 USA USA   | ON1 | NA |
| KT285064 RSVA ON1 NA NA 2014-12-29 CHN CHN | ON1 | NA |
| KJ672471 RSVA NA F 3M 2013-03-01 USA TN    | ON1 | NA |
| KU950610 RSVA NA F 17W 2013-01-07 USA USA  | ON1 | NA |
| KJ672428 RSVA NA M 2M 2013-01-24 USA TN    | ON1 | NA |
| KU950664 RSVA NA F 8W 2012-10-29 USA USA   | ON1 | NA |
| KJ672449 RSVA NA F 1M 2012-12-10 USA TN    | ON1 | NA |
| KU950557 RSVA NA F 7W 2012-08-08 USA USA   | ON1 | NA |
| KU950570 RSVA NA F 7W 2012-08-08 USA USA   | ON1 | NA |
| KU950550 RSVA NA F 10W 2012-10-02 USA USA  | ON1 | NA |
| 61951 RSVA NA NA NA 2013-02-17 JOR Amman   | ON1 | NA |
| KU950615 RSVA NA M 3W 2012-12-17 USA USA   | ON1 | NA |
| KU950631 RSVA NA M 7W 2012-09-21 USA USA   | ON1 | NA |
| 61955 RSVA NA NA NA 2012-10-23 JOR Amman   | ON1 | NA |
| 61954 RSVA NA NA NA 2013-01-16 JOR Amman   | ON1 | NA |
| KC731482 RSVA NA NA NA 2011-- IND IND      | ON1 | NA |

|                                           |     |    |
|-------------------------------------------|-----|----|
| KU950594 RSVA NA M 8W 2013-12-20 USA USA  | GA2 | NA |
| KU950670 RSVA NA M 1W 2012-11-19 USA USA  | GA2 | NA |
| KM042391 RSVA NA F 7M 2013-03-15 USA TN   | GA2 | NA |
| KJ672437 RSVA NA F 1M 2013-01-11 USA TN   | GA2 | NA |
| KU950628 RSVA NA F 9W 2013-10-02 USA USA  | GA2 | NA |
| KU950636 RSVA NA F 8W 2012-11-01 USA USA  | GA2 | NA |
| KJ672457 RSVA NA M 5M 2013-01-07 USA TN   | GA2 | NA |
| KU950581 RSVA NA F 4W 2012-11-08 USA USA  | GA2 | NA |
| KU950583 RSVA NA F 2W 2013-07-12 USA USA  | GA2 | NA |
| KU950685 RSVA NA F 9W 2013-09-27 USA USA  | GA2 | NA |
| KU950459 RSVA NA M 9W 2013-12-19 USA USA  | GA2 | NA |
| KU950560 RSVA NA F 6W 2013-11-05 USA USA  | GA2 | NA |
| KU950540 RSVA NA M 22W 2013-11-26 USA USA | GA2 | NA |
| KU950523 RSVA NA M 27W 2014-03-26 USA USA | GA2 | NA |
| KU950486 RSVA NA M 18W 2012-11-20 USA USA | GA2 | NA |
| KU950677 RSVA NA F 9W 2012-09-11 USA USA  | GA2 | NA |
| KU950537 RSVA NA F 6W 2014-01-08 USA USA  | GA2 | NA |
| KU950686 RSVA NA F 24W 2014-01-10 USA USA | GA2 | NA |
| KU950506 RSVA NA M 8W 2013-10-10 USA USA  | GA2 | NA |
| KU950499 RSVA NA M 2W 2013-10-04 USA USA  | GA2 | NA |
| KU950520 RSVA NA M 2W 2013-06-20 USA USA  | GA2 | NA |
| KU950629 RSVA NA M 2W 2013-07-11 USA USA  | GA2 | NA |
| KU950643 RSVA NA F 6W 2012-10-02 USA USA  | GA2 | NA |
| KU950556 RSVA NA F 11W 2012-12-04 USA USA | GA2 | NA |
| KU950655 RSVA NA M 17W 2012-12-27 USA USA | GA2 | NA |
| KJ672458 RSVA NA F 2M 2013-02-18 USA TN   | GA2 | NA |
| KM042392 RSVA NA M 1M 2013-02-22 USA TN   | GA2 | NA |
| KJ672465 RSVA NA F 5M 2012-12-31 USA TN   | GA2 | NA |
| KU950531 RSVA NA F 2W 2013-08-19 USA USA  | GA2 | NA |
| KJ627264 RSVA NA M 12D 2012-05-16 PER PER | GA2 | NA |
| KU950502 RSVA NA M 4W 2012-09-24 USA USA  | GA2 | NA |
| KU839626 RSVA NA NA NA 2013-11-05 USA TN  | GA2 | NA |
| KU950544 RSVA NA F 7W 2013-12-17 USA USA  | GA2 | NA |
| KU950639 RSVA NA M 1W 2013-10-17 USA USA  | GA2 | NA |
| KU950491 RSVA NA M 6W 2013-09-04 USA USA  | GA2 | NA |
| KU839639 RSVA NA NA NA 2013-12-17 USA TN  | GA2 | NA |
| KU950641 RSVA NA M 17W 2013-11-18 USA USA | GA2 | NA |
| KU950650 RSVA NA F 14W 2013-09-23 USA USA | GA2 | NA |
| KU839630 RSVA NA NA NA 2014-01-07 USA TN  | GA2 | NA |
| KU950455 RSVA NA F 5W 2013-09-24 USA USA  | GA2 | NA |

|                                           |     |    |
|-------------------------------------------|-----|----|
| KU950505 RSVA NA M 4W 2013-11-07 USA USA  | GA2 | NA |
| KU950623 RSVA NA M 2W 2013-08-14 USA USA  | GA2 | NA |
| KU950566 RSVA NA M 18W 2013-11-26 USA USA | GA2 | NA |
| KU950638 RSVA NA F 5W 2013-11-26 USA USA  | GA2 | NA |
| KU950644 RSVA NA M 2W 2013-11-25 USA USA  | GA2 | NA |
| KU839624 RSVA NA NA NA 2013-11-11 USA TN  | GA2 | NA |
| KU950519 RSVA NA M 20W 2013-10-29 USA USA | GA2 | NA |
| KU950549 RSVA NA M 10W 2013-11-05 USA USA | GA2 | NA |
| KU950698 RSVA NA M 7W 2013-11-20 USA USA  | GA2 | NA |
| KU950518 RSVA NA M 17W 2013-10-09 USA USA | GA2 | NA |
| KU839631 RSVA NA NA NA 2013-11-26 USA TN  | GA2 | NA |
| KU950683 RSVA NA M 2W 2013-09-27 USA USA  | GA2 | NA |
| KU950527 RSVA NA F 9W 2013-08-26 USA USA  | GA2 | NA |
| KU950464 RSVA NA F 12W 2014-02-19 USA USA | GA2 | NA |
| KU950456 RSVA NA M 2W 2013-08-07 USA USA  | GA2 | NA |
| KU950460 RSVA NA F 14W 2013-12-05 USA USA | GA2 | NA |
| KU950590 RSVA NA M 1W 2013-07-24 USA USA  | GA2 | NA |
| KU950470 RSVA NA F 8W 2013-10-09 USA USA  | GA2 | NA |
| KU950608 RSVA NA M 7W 2013-10-15 USA USA  | GA2 | NA |
| KU950472 RSVA NA M 2W 2013-07-18 USA USA  | GA2 | NA |
| KU950598 RSVA NA M 2W 2013-10-07 USA USA  | GA2 | NA |
| KU950541 RSVA NA F 2W 2013-01-04 USA USA  | GA2 | NA |
| KU950595 RSVA NA M 1W 2012-12-21 USA USA  | GA2 | NA |
| KU950634 RSVA NA F 9W 2012-09-17 USA USA  | GA2 | NA |
| KJ672439 RSVA NA M 1M 2012-12-17 USA TN   | GA2 | NA |
| KU950658 RSVA NA M 3W 2012-09-12 USA USA  | GA2 | NA |
| KU950645 RSVA NA M 13W 2013-01-17 USA USA | GA2 | NA |
| KU950579 RSVA NA F 9W 2012-10-09 USA USA  | GA2 | NA |
| KU950545 RSVA NA M 8W 2012-10-18 USA USA  | GA2 | NA |
| KJ672443 RSVA NA M 1M 2013-01-31 USA TN   | GA2 | NA |
| KJ672431 RSVA NA M 1M 2012-12-10 USA TN   | GA2 | NA |
| KJ672455 RSVA NA M 2M 2012-12-26 USA TN   | GA2 | NA |
| KU950538 RSVA NA M 18W 2012-10-25 USA USA | GA2 | NA |
| KU950554 RSVA NA M 1W 2012-11-02 USA USA  | GA2 | NA |
| KU950522 RSVA NA F 9W 2012-11-13 USA USA  | GA2 | NA |
| KM042381 RSVA NA F 5M 2013-01-10 USA TN   | GA2 | NA |
| KJ672456 RSVA NA M 2M 2012-12-07 USA TN   | GA2 | NA |
| KJ672434 RSVA NA F 3M 2013-01-24 USA TN   | GA2 | NA |
| KJ672446 RSVA NA M 3M 2012-12-11 USA TN   | GA2 | NA |
| KU950528 RSVA NA M 26W 2013-01-14 USA USA | GA2 | NA |

|                                           |     |    |
|-------------------------------------------|-----|----|
| KU950624 RSVA NA M 4W 2013-01-23 USA USA  | GA2 | NA |
| KJ672450 RSVA NA M 5M 2013-01-31 USA TN   | GA2 | NA |
| KU950546 RSVA NA M 9W 2012-09-14 USA USA  | GA2 | NA |
| KJ672442 RSVA NA M 1M 2013-02-11 USA TN   | GA2 | NA |
| KJ672435 RSVA NA M 2M 2012-12-28 USA TN   | GA2 | NA |
| KJ672426 RSVA NA M 3M 2013-01-08 USA TN   | GA2 | NA |
| KJ672478 RSVA NA F 4M 2013-01-10 USA TN   | GA2 | NA |
| KJ672477 RSVA NA M 2M 2012-12-20 USA TN   | GA2 | NA |
| KJ672427 RSVA NA F 6M 2012-11-09 USA TN   | GA2 | NA |
| KJ672484 RSVA NA M 4M 2012-12-26 USA TN   | GA2 | NA |
| KJ672482 RSVA NA M 2M 2012-12-28 USA TN   | GA2 | NA |
| KU950498 RSVA NA M 7W 2012-10-04 USA USA  | GA2 | NA |
| KM042385 RSVA NA F 1M 2013-01-07 USA TN   | GA2 | NA |
| KU950469 RSVA NA M 3W 2012-09-11 USA USA  | GA2 | NA |
| KU950632 RSVA NA M 7W 2012-10-19 USA USA  | GA2 | NA |
| KU950620 RSVA NA M 17W 2012-10-04 USA USA | GA2 | NA |
| KU950563 RSVA NA M 17W 2012-10-29 USA USA | GA2 | NA |
| KU950529 RSVA NA M 17W 2012-09-28 USA USA | GA2 | NA |
| KJ672460 RSVA NA M 1M 2013-01-04 USA TN   | GA2 | NA |
| KJ672463 RSVA NA F 1M 2013-01-08 USA TN   | GA2 | NA |
| KM042384 RSVA NA M 3M 2013-02-13 USA TN   | GA2 | NA |
| KU950646 RSVA NA M 1W 2012-11-21 USA USA  | GA2 | NA |
| KJ672453 RSVA NA M 5M 2013-01-10 USA TN   | GA2 | NA |
| KU950507 RSVA NA M 3W 2012-08-27 USA USA  | GA2 | NA |
| KU950536 RSVA NA F 10W 2012-08-16 USA USA | GA2 | NA |
| KU950649 RSVA NA F 10W 2012-08-16 USA USA | GA2 | NA |
| KU950667 RSVA NA F 16W 2012-10-05 USA USA | GA2 | NA |
| KJ672459 RSVA NA M 4M 2013-01-23 USA TN   | GA2 | NA |
| KU950661 RSVA NA M 21W 2012-12-26 USA USA | GA2 | NA |
| KJ672436 RSVA NA F 6M 2012-12-06 USA TN   | GA2 | NA |
| 61936 RSVA NA NA NA 2011-03-01 JOR Amman  | GA2 | NA |
| 61975 RSVA NA NA NA 2012-01-08 JOR Amman  | GA2 | NA |
| KJ627374 RSVA NA F 1Y 2011-04-19 PER PER  | GA2 | NA |
| KU950652 RSVA NA M 9W 2012-09-10 USA USA  | GA2 | NA |
| JF920053 RSVA GA2 NA NA 2010-02-16 USA WI | GA2 | NA |
| KF826849 RSVA NA F 2Y 2010-01-05 USA WI   | GA2 | NA |
| KF530269 RSVA NA M 2Y 2009-12-10 USA WI   | GA2 | NA |
| JF920052 RSVA GA2 NA NA 2010-01-13 USA WI | GA2 | NA |
| 61995 RSVA NA NA NA 2012-03-19 JOR Amman  | GA2 | 12 |
| 61999 RSVA NA NA NA 2012-03-06 JOR Amman  | GA2 | 12 |

|                                           |     |    |
|-------------------------------------------|-----|----|
| 61962 RSVA NA NA NA 2011-02-08 JOR Amman  | GA2 | 5  |
| KC731483 RSVA NA NA NA 2011-- IND IND     | GA2 | NA |
| KP663728 RSVA NA NA NA 2012-07-16 KOR KOR | GA2 | NA |
| KC978856 RSVA NA NA NA 2011-12-11 CHN CHN | GA2 | NA |
| 61944 RSVA NA NA NA 2012-12-31 JOR Amman  | GA2 | 14 |
| KJ627292 RSVA NA F 9M 2010-04-19 PER PER  | GA2 | NA |
| KJ627371 RSVA NA M 14Y 2010-05-01 PER PER | GA2 | NA |
| KJ627358 RSVA NA M 10M 2010-03-05 PER PER | GA2 | NA |
| KJ627263 RSVA NA M 10M 2010-08-01 PER PER | GA2 | NA |
| KJ627334 RSVA NA F 6Y 2010-08-06 PER PER  | GA2 | NA |
| KJ627296 RSVA NA F 10Y 2010-04-24 PER PER | GA2 | NA |
| KJ627345 RSVA NA M 1M 2010-03-19 PER PER  | GA2 | NA |
| KJ627357 RSVA NA M 2Y 2010-04-30 PER PER  | GA2 | NA |
| KJ627307 RSVA NA M 1Y 2010-05-25 PER PER  | GA2 | NA |
| KJ627273 RSVA NA F 6M 2010-03-16 PER PER  | GA2 | NA |
| KJ627269 RSVA NA M 1M 2010-01-30 PER PER  | GA2 | NA |
| KJ627270 RSVA NA M 4M 2010-03-28 PER PER  | GA2 | NA |
| KJ627329 RSVA NA M 7Y 2010-04-28 PER PER  | GA2 | NA |
| KJ627313 RSVA NA F 21D 2010-04-22 PER PER | GA2 | NA |
| KJ627298 RSVA NA M 2Y 2010-04-14 PER PER  | GA2 | NA |
| KJ627325 RSVA NA F 1Y 2010-03-30 PER PER  | GA2 | NA |
| KJ627258 RSVA NA M 4Y 2010-04-24 PER PER  | GA2 | NA |
| KJ627333 RSVA NA F 2M 2010-03-11 PER PER  | GA2 | NA |
| KF826833 RSVA NA M 1Y 2009-03-19 ITA ITA  | GA2 |    |
| 61932 RSVA NA NA NA 2010-12-26 JOR Amman  | GA2 | 3  |
| 61927 RSVA NA NA NA 2011-04-18 JOR Amman  | GA2 | 3  |
| 61961 RSVA NA NA NA 2011-02-06 JOR Amman  | GA2 | 3  |
| 61928 RSVA NA NA NA 2011-03-20 JOR Amman  | GA2 | 3  |
| 61963 RSVA NA NA NA 2011-02-09 JOR Amman  | GA2 | 3  |
| 61947 RSVA NA NA NA 2011-02-27 JOR Amman  | GA2 | 3  |
| 61935 RSVA NA NA NA 2011-03-02 JOR Amman  | GA2 | 3  |
| 62014 RSVA NA NA NA 2011-02-21 JOR Amman  | GA2 | 3  |
| 61929 RSVA NA NA NA 2011-01-24 JOR Amman  | GA2 | 3  |
| 61934 RSVA NA NA NA 2011-01-24 JOR Amman  | GA2 | 3  |
| 61990 RSVA NA NA NA 2012-02-05 JOR Amman  | GA2 | 3  |
| 61978 RSVA NA NA NA 2012-02-12 JOR Amman  | GA2 | 11 |
| 61968 RSVA NA NA NA 2012-02-16 JOR Amman  | GA2 | 4  |
| 61976 RSVA NA NA NA 2012-02-05 JOR Amman  | GA2 | 4  |
| 61997 RSVA NA NA NA 2012-02-21 JOR Amman  | GA2 | 4  |
| 61998 RSVA NA NA NA 2012-02-20 JOR Amman  | GA2 | 4  |



|                                            |     |    |
|--------------------------------------------|-----|----|
| 61988 RSVA NA NA NA 2012-02-01 JOR Amman   | GA2 | 4  |
| 61974 RSVA NA NA NA 2012-01-22 JOR Amman   | GA2 | 4  |
| 62002 RSVA NA NA NA 2012-02-28 JOR Amman   | GA2 | 4  |
| 61984 RSVA NA NA NA 2012-01-26 JOR Amman   | GA2 | 4  |
| 62016 RSVA NA NA NA 2012-01-26 JOR Amman   | GA2 | 4  |
| 61960 RSVA NA NA NA 2011-02-02 JOR Amman   | GA2 | 4  |
| 61930 RSVA NA NA NA 2011-01-26 JOR Amman   | GA2 | 4  |
| KF826855 RSVA NA F 1M 2009-03-26 ITA ITA   | GA2 | NA |
| 61965 RSVA NA NA NA 2010-03-22 JOR Amman   | GA2 | 1  |
| 61979 RSVA NA NA NA 2010-05-05 JOR Amman   | GA2 | 1  |
| 61977 RSVA NA NA NA 2010-06-15 JOR Amman   | GA2 | 1  |
| 61926 RSVA NA NA NA 2011-03-14 JOR Amman   | GA2 | 6  |
| KJ627316 RSVA NA F 4M 2010-04-21 PER PER   | GA2 | NA |
| KM517572 RSVA NA NA NA 2011-02-24 CHN CHN  | GA2 | NA |
| JX015496 RSVA GA2 NA NA 2008-11-26 NLD NLD | GA2 | NA |
| 62015 RSVA NA NA NA 2011-03-20 JOR Amman   | GA2 | 7  |
| KJ627351 RSVA NA M 2Y 2011-04-13 PER PER   | GA2 | NA |
| KJ627370 RSVA NA M 1Y 2011-05-16 PER PER   | GA2 | NA |
| KJ627320 RSVA NA F 4Y 2010-04-24 PER PER   | GA2 | NA |
| KJ627250 RSVA NA M 2Y 2010-06-08 PER PER   | GA2 | NA |
| KJ627252 RSVA NA F 3Y 2010-01-19 PER PER   | GA2 | NA |
| KJ627297 RSVA NA F 2Y 2010-05-07 PER PER   | GA2 | NA |
| KJ627312 RSVA NA F 6Y 2010-05-20 PER PER   | GA2 | NA |
| KJ627283 RSVA NA F 4Y 2010-05-15 PER PER   | GA2 | NA |
| KJ627355 RSVA NA F 1Y 2010-02-17 PER PER   | GA2 | NA |
| KJ627295 RSVA NA F 2Y 2010-02-24 PER PER   | GA2 | NA |
| KJ627346 RSVA NA F 1Y 2010-02-28 PER PER   | GA2 | NA |
| KJ627326 RSVA NA M 3Y 2010-02-23 PER PER   | GA2 | NA |
| KJ627287 RSVA NA M 7M 2010-04-08 PER PER   | GA2 | NA |
| KJ627268 RSVA NA F 4Y 2010-04-22 PER PER   | GA2 | NA |
| KJ627261 RSVA NA M 3Y 2010-04-21 PER PER   | GA2 | NA |
| KJ627301 RSVA NA F 8M 2010-04-14 PER PER   | GA2 | NA |
| KJ627245 RSVA NA M 1M 2010-04-29 PER PER   | GA2 | NA |
| KJ627309 RSVA NA F 10Y 2010-04-15 PER PER  | GA2 | NA |
| KJ627279 RSVA NA F 6Y 2010-05-18 PER PER   | GA2 | NA |
| KJ627367 RSVA NA M 5Y 2010-05-06 PER PER   | GA2 | NA |
| KJ627253 RSVA NA M 2M 2009-09-25 PER PER   | GA2 | NA |
| KJ627372 RSVA NA F 7M 2010-02-27 PER PER   | GA2 | NA |
| KJ627256 RSVA NA M 10M 2009-08-16 PER PER  | GA2 | NA |
| KJ627365 RSVA NA M 1Y 2010-03-23 PER PER   | GA2 | NA |

|                                            |     |    |
|--------------------------------------------|-----|----|
| KJ627306 RSVA NA F 4M 2009-05-11 PER PER   | GA2 | NA |
| KJ627360 RSVA NA M 2Y 2009-05-14 PER PER   | GA2 | NA |
| KJ627318 RSVA NA F 1Y 2009-04-17 PER PER   | GA2 | NA |
| KJ627291 RSVA NA M 4Y 2009-05-02 PER PER   | GA2 | NA |
| KJ627373 RSVA NA M 4Y 2009-05-13 PER PER   | GA2 | NA |
| KJ627315 RSVA NA M 11M 2009-05-22 PER PER  | GA2 | NA |
| KJ627272 RSVA NA F 2M 2009-04-27 PER PER   | GA2 | NA |
| KJ627319 RSVA NA F 1Y 2009-04-21 PER PER   | GA2 | NA |
| KJ627344 RSVA NA F 4Y 2009-04-23 PER PER   | GA2 | NA |
| KJ627286 RSVA NA M 8M 2009-04-18 PER PER   | GA2 | NA |
| KJ627350 RSVA NA M 2Y 2009-04-05 PER PER   | GA2 | NA |
| KJ627294 RSVA NA F 45Y 2010-05-20 PER PER  | GA2 | NA |
| 61971 RSVA NA NA NA 2012-01-30 JOR Amman   | GA2 | 9  |
| 61993 RSVA NA NA NA 2012-02-21 JOR Amman   | GA2 | 9  |
| KJ939944 RSVA NA NA NA 2010-06-22 VNM VNM  | GA2 | NA |
| KJ939963 RSVA NA NA NA 2010-08-09 VNM VNM  | GA2 | NA |
| KJ939960 RSVA NA NA NA 2010-07-09 VNM VNM  | GA2 | NA |
| KJ939950 RSVA NA NA NA 2010-07-02 VNM VNM  | GA2 | NA |
| KJ939956 RSVA NA NA NA 2010-05-05 VNM VNM  | GA2 | NA |
| KJ939949 RSVA NA NA NA 2010-03-26 VNM VNM  | GA2 | NA |
| KJ939957 RSVA NA NA NA 2010-05-17 VNM VNM  | GA2 | NA |
| KJ939952 RSVA NA NA NA 2009-11-11 VNM VNM  | GA2 | NA |
| KJ939962 RSVA NA NA NA 2010-07-13 VNM VNM  | GA2 | NA |
| KJ939964 RSVA NA NA NA 2010-08-12 VNM VNM  | GA2 | NA |
| KJ939959 RSVA NA NA NA 2010-06-30 VNM VNM  | GA2 | NA |
| KJ939969 RSVA NA NA NA 2010-09-23 VNM VNM  | GA2 | NA |
| KJ939945 RSVA NA NA NA 2010-06-23 VNM VNM  | GA2 | NA |
| KJ939958 RSVA NA NA NA 2010-06-15 VNM VNM  | GA2 | NA |
| KJ939941 RSVA NA NA NA 2010-04-21 VNM VNM  | GA2 | NA |
| KJ939951 RSVA NA NA NA 2009-10-28 VNM VNM  | GA2 | NA |
| KJ939968 RSVA NA NA NA 2010-09-15 VNM VNM  | GA2 | NA |
| KJ939967 RSVA NA NA NA 2010-09-15 VNM VNM  | GA2 | NA |
| KJ939946 RSVA NA NA NA 2010-07-05 VNM VNM  | GA2 | NA |
| KJ939953 RSVA NA NA NA 2010-03-18 VNM VNM  | GA2 | NA |
| KJ939942 RSVA NA NA NA 2010-06-04 VNM VNM  | GA2 | NA |
| JX015479 RSVA GA2 NA NA 2011-01-03 NLD NLD | GA2 | NA |
| KJ627303 RSVA NA F 2M 2010-04-20 PER PER   | GA2 | NA |
| KJ627308 RSVA NA F 2Y 2010-04-13 PER PER   | GA2 | NA |
| KJ627343 RSVA NA M 4Y 2010-03-30 PER PER   | GA2 | NA |
| KJ627356 RSVA NA M 1Y 2010-04-22 PER PER   | GA2 | NA |

|                                            |     |    |
|--------------------------------------------|-----|----|
| KM578843 RSVA NA NA NA 2012-01-10 CHN CHN  | GA2 | NA |
| JX015483 RSVA GA2 NA NA 2008-12-29 NLD NLD | GA2 | NA |
| JF920054 RSVA GA2 NA NA 2010-02-16 USA WI  | GA2 | NA |
| KJ627349 RSVA NA M 1M 2009-09-17 PER PER   | GA2 | NA |
| KJ627246 RSVA NA M 3M 2009-04-23 PER PER   | GA2 | NA |
| KJ627304 RSVA NA M 2Y 2009-04-15 PER PER   | GA2 | NA |
| KJ627322 RSVA NA M 9M 2009-04-03 PER PER   | GA2 | NA |
| KJ627300 RSVA NA M 1Y 2009-05-13 PER PER   | GA2 | NA |
| KJ939955 RSVA NA NA NA 2010-04-29 VNM VNM  | GA2 | NA |
| KJ939970 RSVA NA NA NA 2010-11-29 VNM VNM  | GA2 | NA |
| 61986 RSVA NA NA NA 2012-01-31 JOR Amman   | GA2 | 10 |
| 61994 RSVA NA NA NA 2012-03-29 JOR Amman   | GA2 | 13 |
| KJ627259 RSVA NA M 7Y 2011-04-08 PER PER   | GA2 | NA |
| KF826856 RSVA NA M 9Y 2009-04-23 ITA ITA   | GA2 | NA |
| 61972 RSVA NA NA NA 2012-01-09 JOR Amman   | GA2 | 2  |
| 61980 RSVA NA NA NA 2012-01-23 JOR Amman   | GA2 | 2  |
| 62004 RSVA NA NA NA 2012-04-12 JOR Amman   | GA2 | 2  |
| 61969 RSVA NA NA NA 2012-01-31 JOR Amman   | GA2 | 2  |
| 62007 RSVA NA NA NA 2013-03-26 JOR Amman   | GA2 | 2  |
| 61937 RSVA NA NA NA 2011-03-08 JOR Amman   | GA2 | 2  |
| 61933 RSVA NA NA NA 2011-01-19 JOR Amman   | GA2 | 2  |
| 62013 RSVA NA NA NA 2011-02-20 JOR Amman   | GA2 | 2  |
| 61991 RSVA NA NA NA 2012-03-13 JOR Amman   | GA2 | 2  |
| 61996 RSVA NA NA NA 2012-04-04 JOR Amman   | GA2 | 2  |
| 61970 RSVA NA NA NA 2012-02-12 JOR Amman   | GA2 | 2  |
| 61985 RSVA NA NA NA 2012-02-09 JOR Amman   | GA2 | 2  |
| 62000 RSVA NA NA NA 2012-02-28 JOR Amman   | GA2 | 2  |
| KJ939937 RSVA NA NA NA 2009-08-12 VNM VNM  | GA2 | NA |
| KJ939938 RSVA NA NA NA 2009-09-11 VNM VNM  | GA2 | NA |
| KJ939940 RSVA NA NA NA 2009-12-01 VNM VNM  | GA2 | NA |
| KJ939935 RSVA NA NA NA 2009-07-21 VNM VNM  | GA2 | NA |
| KJ939936 RSVA NA NA NA 2009-07-22 VNM VNM  | GA2 | NA |
| KJ939939 RSVA NA NA NA 2009-10-15 VNM VNM  | GA2 | NA |
| KJ939965 RSVA NA NA NA 2010-08-24 VNM VNM  | GA2 | NA |
| KJ627267 RSVA NA M 6M 2010-02-08 PER PER   | GA2 | NA |
| KJ627275 RSVA NA F 5Y 2010-05-24 PER PER   | GA2 | NA |
| JX015494 RSVA GA2 NA NA 2008-01-14 NLD NLD | GA2 | NA |
| KF530261 RSVA NA NA NA 2008-05-01 DEU DEU  | GA2 | NA |
| KP317953 RSVA NA NA NA 2012-03-23 KEN KEN  | GA2 | NA |
| 61987 RSVA NA NA NA 2012-01-17 JOR Amman   | GA2 | 8  |

|                                            |     |    |
|--------------------------------------------|-----|----|
| 61989 RSVA NA NA NA 2012-01-30 JOR Amman   | GA2 | 8  |
| 62001 RSVA NA NA NA 2012-02-27 JOR Amman   | GA2 | 8  |
| 61983 RSVA NA NA NA 2011-12-19 JOR Amman   | GA2 | 8  |
| KJ627271 RSVA NA F 1Y 2009-05-29 PER PER   | GA2 | NA |
| KJ939961 RSVA NA NA NA 2010-07-09 VNM VNM  | GA2 | NA |
| KJ939971 RSVA NA NA NA 2010-12-06 VNM VNM  | GA2 | NA |
| JX015484 RSVA GA2 NA NA 2007-11-06 NLD NLD | GA2 | NA |
| JX015492 RSVA GA2 NA NA 2007-12-24 NLD NLD | GA2 | NA |
| JX015489 RSVA GA2 NA NA 2007-12-03 NLD NLD | GA2 | NA |
| JX015491 RSVA GA2 NA NA 2007-11-23 NLD NLD | GA2 | NA |
| JX015490 RSVA GA2 NA NA 2007-11-19 NLD NLD | GA2 | NA |
| JX015493 RSVA GA2 NA NA 2008-01-07 NLD NLD | GA2 | NA |
| JX015482 RSVA GA2 NA NA 2006-11-22 BEL BEL | GA2 | NA |
| KF826831 RSVA NA NA NA 2009-12-01 DEU DEU  | GA2 | NA |
| KJ939947 RSVA NA NA NA 2010-07-22 VNM VNM  | GA2 | NA |
| KJ939966 RSVA NA NA NA 2010-09-03 VNM VNM  | GA2 | NA |
| JX015498 RSVA GA2 NA NA 2008-12-27 NLD NLD | GA2 | NA |
| KF826830 RSVA NA NA NA 2009-03-01 DEU DEU  | GA2 | NA |
| KJ627328 RSVA NA M 2Y 2010-05-20 PER PER   | GA2 | NA |
| KJ627369 RSVA NA M 2Y 2009-03-18 PER PER   | GA2 | NA |
| KJ627281 RSVA NA F 11M 2009-04-14 PER PER  | GA2 | NA |
| KJ627354 RSVA NA F 4Y 2009-03-25 PER PER   | GA2 | NA |
| KJ627338 RSVA NA F 4M 2009-05-08 PER PER   | GA2 | NA |
| KJ627293 RSVA NA F 5M 2009-05-25 PER PER   | GA2 | NA |
| JF920046 RSVA GA2 NA NA 2007-- USA WI      | GA2 | NA |
| JF920047 RSVA GA2 NA NA 2008-01-17 USA WI  | GA2 | NA |
| JF920048 RSVA GA2 NA NA 2007-- USA WI      | GA2 | NA |
| KF826821 RSVA NA NA NA 2007-- USA WI       | GA2 | NA |
| KJ627266 RSVA NA M 2Y 2009-04-13 PER PER   | GA2 | NA |
| KJ627288 RSVA NA F 1Y 2009-05-28 PER PER   | GA2 | NA |
| KJ627274 RSVA NA M 5M 2009-04-02 PER PER   | GA2 | NA |
| KJ627362 RSVA NA M 1Y 2009-05-19 PER PER   | GA2 | NA |
| KJ627282 RSVA NA M 6M 2009-04-08 PER PER   | GA2 | NA |
| KF826840 RSVA NA F 2M 2007-02-16 MEX MEX   | GA2 | NA |
| JF920049 RSVA GA2 NA NA 2007-12-28 USA WI  | GA2 | NA |
| JF920051 RSVA GA2 NA NA 2007-12-22 USA WI  | GA2 | NA |
| JX015499 RSVA GA2 NA NA 2008-10-22 BEL BEL | GA2 | NA |
| KJ627337 RSVA NA F 1Y 2009-05-27 PER PER   | GA2 | NA |
| KJ627335 RSVA NA F 4M 2009-05-16 PER PER   | GA2 | NA |
| KJ627290 RSVA NA M 1Y 2009-03-23 PER PER   | GA2 | NA |

|                                            |     |    |
|--------------------------------------------|-----|----|
| KJ627257 RSVA NA M NA 2009-02-09 PER PER   | GA2 | NA |
| KF826838 RSVA NA NA NA 2006-06-06 ARG ARG  | GA2 | NA |
| JX015495 RSVA GA2 NA NA 2008-11-21 NLD NLD | GA2 | NA |
| JX015497 RSVA GA2 NA NA 2008-12-06 NLD NLD | GA2 | NA |
| JQ901447 RSVA GA2 NA NA 2001-01-03 NLD NLD | GA2 | NA |
| KJ627324 RSVA NA F 11Y 2009-04-20 PER PER  | GA2 | NA |
| KJ627321 RSVA NA M 4Y 2009-04-17 PER PER   | GA2 | NA |
| KJ627366 RSVA NA F 10M 2009-04-20 PER PER  | GA2 | NA |
| KJ627339 RSVA NA M 2Y 2009-03-11 PER PER   | GA2 | NA |
| KJ627314 RSVA NA F 9M 2009-05-18 PER PER   | GA2 | NA |
| KJ627284 RSVA NA M 3Y 2009-05-29 PER PER   | GA2 | NA |
| KJ627289 RSVA NA M 2Y 2009-05-11 PER PER   | GA2 | NA |
| KJ627248 RSVA NA F 6Y 2009-04-30 PER PER   | GA2 | NA |
| KJ627276 RSVA NA F 3Y 2009-04-29 PER PER   | GA2 | NA |
| KJ627327 RSVA NA F 1M 2007-07-25 PER PER   | GA2 | NA |
| KJ627260 RSVA NA M 4Y 2008-03-17 PER PER   | GA2 | NA |
| KJ627336 RSVA NA F 3M 2008-02-29 PER PER   | GA2 | NA |
| KJ627255 RSVA NA F 1M 2009-04-01 PER PER   | GA2 | NA |
| KJ627311 RSVA NA F 4M 2008-06-06 PER PER   | GA2 | NA |
| KJ627353 RSVA NA F 1M 2008-03-18 PER PER   | GA2 | NA |
| JX069799 RSVA GA2 F NA 2001-03-13 USA TN   | GA2 | NA |
| JQ901457 RSVA GA2 NA NA 2003-12-22 NLD NLD | GA2 | NA |
| JX015486 RSVA GA2 NA NA 2005-01-05 NLD NLD | GA2 | NA |
| JQ901458 RSVA GA2 NA NA 2003-12-23 NLD NLD | GA2 | NA |
| JF920057 RSVA GA2 NA NA 1998-03-21 USA WI  | GA2 | NA |
| KP856968 RSVA NA M 26M 1998-- USA NY       | GA2 | NA |
| KU316141 RSVA NA M 7M 1998-- USA NY        | GA2 | NA |
| KU316091 RSVA NA F 3M 1998-- USA NY        | GA2 | NA |
| KF826848 RSVA NA NA NA 2007-- AUS AUS      | GA2 | NA |
| JX015480 RSVA GA2 NA NA 2007-12-10 NLD NLD | GA2 | NA |
| JQ901452 RSVA GA2 NA NA 2001-12-22 NLD NLD | GA2 | NA |
| JQ901453 RSVA GA2 NA NA 2002-01-03 NLD NLD | GA2 | NA |
| KJ627352 RSVA NA M 3Y 2007-03-17 PER PER   | GA2 | NA |
| KJ627361 RSVA NA F 11M 2007-01-26 PER PER  | GA2 | NA |
| KJ627305 RSVA NA F 1Y 2007-03-17 PER PER   | GA2 | NA |
| KP119748 RSVA NA NA NA 2012-09-20 HKG HKG  | GA2 | NA |
| KP119746 RSVA NA NA NA 2012-09-20 HKG HKG  | GA2 | NA |
| KP119745 RSVA NA NA NA 2012-09-20 HKG HKG  | GA2 | NA |
| KP119747 RSVA NA NA NA 2012-09-20 HKG HKG  | GA2 | NA |
| KP218910 RSVA NA NA NA 2008-11-30 CHN CHN  | GA2 | NA |

|                                           |                       |    |
|-------------------------------------------|-----------------------|----|
| KU950573 RSVA NA F 38W 2006-01-07 USA USA | GA2                   | NA |
| KJ627647 RSVA NA M 2M 2001-- USA TN       | GA2                   | NA |
| KJ627648 RSVA NA M 2M 2001-- USA TN       | GA2                   | NA |
| JX069798 RSVA GA2 M NA 2001-02-20 USA TN  | GA2                   | NA |
| KP258697 RSVA NA F 1.2M 1994-- USA NY     | GA2                   | NA |
| KU316139 RSVA NA F 12M 1994-- USA NY      | GA2                   | NA |
| KU316131 RSVA NA F 2M 1994-- USA NY       | GA2                   | NA |
| KU316118 RSVA NA M 4M 1996-- USA NY       | GA2                   | NA |
| KU316126 RSVA NA F 20M 1984-- USA NY      | GA2                   | NA |
| KU316142 RSVA NA F 11M 1982-- USA NY      | GA2                   | NA |
| KU316148 RSVA NA F 3W 1984-- USA NY       | GA2                   | NA |
| KU316166 RSVA NA F 1Y 1977-- USA NY       | GA2                   | NA |
| JF920065 RSVA GA7 NA NA 1998-01-09 USA WI | GA7                   | NA |
| JX069801 RSVA NA M NA 1998-03-02 USA TN   | GA7                   | NA |
| JX069800 RSVA NA F NA 1997-12-22 USA TN   | GA7                   | NA |
| JF920062 RSVA GA7 NA NA 1998-01-06 USA WI | GA7                   | NA |
| KP258743 RSVA NA M 7M 1998-- USA NY       | GA7                   | NA |
| KU316092 RSVA NA M 2Y 1991-- USA NY       | GA7                   | NA |
| KP258737 RSVA NA M 1Y 1984-- USA NY       | GA7                   | NA |
| KP258700 RSVA NA F 3Y 1985-- USA NY       | GA7                   | NA |
| KU316167 RSVA NA F 5W 1985-- USA NY       | GA7                   | NA |
| KU316110 RSVA NA M 6W 1984-- USA NY       | GA7                   | NA |
| KJ723464 RSVA NA M 52W 1989-- USA NY      | GA7                   | NA |
| KP258734 RSVA NA F 9M 1989-- USA NY       | GA7                   | NA |
| KJ723492 RSVA NA M 3W 1990-- USA NY       | GA7                   | NA |
| KJ723483 RSVA NA M 10W 1984-- USA NY      | Undetermined genotype | NA |
| KU316098 RSVA NA F 2Y 1984-- USA NY       | Undetermined genotype | NA |
| KU316125 RSVA NA M 5W 1984-- USA NY       | Undetermined genotype | NA |
| KP258733 RSVA NA M 4Y 1984-- USA NY       | Undetermined genotype | NA |
| KU316138 RSVA NA M 9M 1987-- USA NY       | Undetermined genotype | NA |
| KP258723 RSVA NA F 3Y 1986-- USA NY       | Undetermined genotype | NA |
| KJ672479 RSVA NA M 2M 2013-01-28 USA TN   | GA5                   | NA |
| KJ672447 RSVA NA M 3M 2013-02-11 USA TN   | GA5                   | NA |
| KJ672474 RSVA NA M 3M 2012-12-31 USA TN   | GA5                   | NA |
| KU950564 RSVA NA F 9W 2012-09-12 USA USA  | GA5                   | NA |
| KU950501 RSVA NA F 2W 2013-01-10 USA USA  | GA5                   | NA |
| KU950473 RSVA NA F 17W 2012-12-04 USA USA | GA5                   | NA |
| KU950479 RSVA NA M 20W 2012-11-19 USA USA | GA5                   | NA |
| KU950487 RSVA NA F 10W 2012-11-07 USA USA | GA5                   | NA |
| KU950616 RSVA NA M 9W 2012-09-24 USA USA  | GA5                   | NA |

|                                            |     |    |
|--------------------------------------------|-----|----|
| KU950609 RSVA NA M 18W 2012-10-22 USA USA  | GA5 | NA |
| KJ672462 RSVA NA M 2M 2013-03-04 USA TN    | GA5 | NA |
| KJ672483 RSVA NA M 1M 2013-01-30 USA TN    | GA5 | NA |
| KF826826 RSVA NA M 16M 2004-12-24 MEX MEX  | GA5 | NA |
| JX015487 RSVA GA5 NA NA 2006-01-02 NLD NLD | GA5 | NA |
| KF826841 RSVA NA NA NA 2007-05-02 ARG ARG  | GA5 | NA |
| KF826850 RSVA NA NA NA 2008-- USA WI       | GA5 | NA |
| KF530268 RSVA NA M 25M 2007-01-27 MEX MEX  | GA5 | NA |
| KF826852 RSVA NA NA NA 2007-- USA WI       | GA5 | NA |
| KF826836 RSVA NA M 1M 2006-01-04 MEX MEX   | GA5 | NA |
| KF826837 RSVA NA F 2M 2006-01-20 MEX MEX   | GA5 | NA |
| KF826846 RSVA NA NA NA 2008-05-15 ARG ARG  | GA5 | NA |
| KF826828 RSVA NA NA NA 2004-06-04 ARG ARG  | GA5 | NA |
| KJ627722 RSVA NA F 3M 2004-- USA TN        | GA5 | NA |
| KJ627721 RSVA NA F 3M 2004-- USA TN        | GA5 | NA |
| KJ627720 RSVA NA F 3M 2004-- USA TN        | GA5 | NA |
| KJ627719 RSVA NA M 1M 2004-- USA TN        | GA5 | NA |
| KJ627662 RSVA NA M 1M 2003-- USA TN        | GA5 | NA |
| KJ627714 RSVA NA M 7M 2003-- USA TN        | GA5 | NA |
| KJ627715 RSVA NA M 7M 2003-- USA TN        | GA5 | NA |
| KJ627668 RSVA NA M 0.6M 2003-- USA TN      | GA5 | NA |
| KJ627667 RSVA NA M 0.6M 2003-- USA TN      | GA5 | NA |
| KJ627666 RSVA NA M 0.6M 2003-- USA TN      | GA5 | NA |
| KJ627716 RSVA NA F 3M 2003-- USA TN        | GA5 | NA |
| KJ627718 RSVA NA F 3M 2003-- USA TN        | GA5 | NA |
| KJ627717 RSVA NA F 3M 2001-- USA TN        | GA5 | NA |
| KF826827 RSVA NA NA NA 2004-05-26 ARG ARG  | GA5 | NA |
| KJ627729 RSVA NA F 0.5M 2003-- USA TN      | GA5 | NA |
| KF826832 RSVA NA M 3M 2009-03-19 ITA ITA   | GA5 | NA |
| JQ901449 RSVA GA5 NA NA 2001-01-10 NLD NLD | GA5 | NA |
| JQ901448 RSVA GA5 NA NA 2001-01-07 NLD NLD | GA5 | NA |
| JQ901456 RSVA GA5 NA NA 2003-11-25 NLD NLD | GA5 | NA |
| KF973328 RSVA NA M 4M 2002-- USA TN        | GA5 | NA |
| KF973321 RSVA NA M 4M 2002-- USA TN        | GA5 | NA |
| KF973329 RSVA NA M 4M 2002-- USA TN        | GA5 | NA |
| KF973323 RSVA NA M 4M 2002-- USA TN        | GA5 | NA |
| KF973320 RSVA NA M 4M 2002-- USA TN        | GA5 | NA |
| KF973333 RSVA NA M 4M 2002-- USA TN        | GA5 | NA |
| KF973324 RSVA NA M 4M 2002-- USA TN        | GA5 | NA |
| KF973319 RSVA NA M 4M 2002-- USA TN        | GA5 | NA |

|                                            |     |    |
|--------------------------------------------|-----|----|
| KF973336 RSVA NA M 4M 2002-- USA TN        | GA5 | NA |
| KF973327 RSVA NA M 4M 2002-- USA TN        | GA5 | NA |
| KF973332 RSVA NA M 4M 2002-- USA TN        | GA5 | NA |
| KF973330 RSVA NA M 4M 2002-- USA TN        | GA5 | NA |
| KF973325 RSVA NA M 4M 2002-- USA TN        | GA5 | NA |
| KF973326 RSVA NA M 4M 2002-- USA TN        | GA5 | NA |
| KF973322 RSVA NA M 4M 2002-- USA TN        | GA5 | NA |
| KF973339 RSVA NA M 4M 2002-- USA TN        | GA5 | NA |
| KF973338 RSVA NA M 4M 2002-- USA TN        | GA5 | NA |
| KF973335 RSVA NA M 4M 2002-- USA TN        | GA5 | NA |
| KF973331 RSVA NA M 4M 2002-- USA TN        | GA5 | NA |
| KF973334 RSVA NA M 4M 2002-- USA TN        | GA5 | NA |
| KF973340 RSVA NA M 4M 2002-- USA TN        | GA5 | NA |
| KJ627649 RSVA NA F 3M 2001-- USA TN        | GA5 | NA |
| JQ901450 RSVA GA5 NA NA 2001-01-24 NLD NLD | GA5 | NA |
| JQ901451 RSVA GA5 NA NA 2001-01-24 NLD NLD | GA5 | NA |
| KJ627708 RSVA NA M 0.5M 2001-- USA TN      | GA5 | NA |
| KJ627709 RSVA NA M 0.5M 2001-- USA TN      | GA5 | NA |
| KJ627676 RSVA NA M 1M 2001-- USA TN        | GA5 | NA |
| KJ627663 RSVA NA F 1M 2003-- USA TN        | GA5 | NA |
| KJ627664 RSVA NA F 1M 2003-- USA TN        | GA5 | NA |
| KJ627670 RSVA NA M 0.4M 2003-- USA TN      | GA5 | NA |
| KJ627671 RSVA NA M 2M 2003-- USA TN        | GA5 | NA |
| KJ627657 RSVA NA M 4M 2003-- USA TN        | GA5 | NA |
| KJ627659 RSVA NA M 4M 2003-- USA TN        | GA5 | NA |
| KJ627724 RSVA NA M 0.3M 2004-- USA TN      | GA5 | NA |
| KJ627723 RSVA NA M 0.3M 2004-- USA TN      | GA5 | NA |
| KJ627725 RSVA NA M 0.3M 2004-- USA TN      | GA5 | NA |
| KJ627727 RSVA NA F 3M 2003-- USA TN        | GA5 | NA |
| KJ627728 RSVA NA F 3M 2003-- USA TN        | GA5 | NA |
| KJ627731 RSVA NA M 1M 2003-- USA TN        | GA5 | NA |
| KJ627733 RSVA NA F 1M 2003-- USA TN        | GA5 | NA |
| KJ627652 RSVA NA M 1M 2002-- USA TN        | GA5 | NA |
| KJ627674 RSVA NA F 1M 2001-- USA TN        | GA5 | NA |
| KJ627675 RSVA NA F 1M 2001-- USA TN        | GA5 | NA |
| KJ627672 RSVA NA F 1M 2001-- USA TN        | GA5 | NA |
| KJ627710 RSVA NA M 5M 2001-- USA TN        | GA5 | NA |
| KJ627688 RSVA NA M 3M 2001-- USA TN        | GA5 | NA |
| KJ627693 RSVA NA F 0.9M 2001-- USA TN      | GA5 | NA |
| KJ627702 RSVA NA F 0.6M 2001-- USA TN      | GA5 | NA |



|                                            |     |    |
|--------------------------------------------|-----|----|
| KJ627704 RSVA NA F 0.6M 2001-- USA TN      | GA5 | NA |
| KJ627703 RSVA NA F 0.6M 2001-- USA TN      | GA5 | NA |
| KJ627707 RSVA NA F 0.6M 2001-- USA TN      | GA5 | NA |
| KJ627705 RSVA NA F 0.6M 2001-- USA TN      | GA5 | NA |
| KJ627706 RSVA NA F 0.6M 2001-- USA TN      | GA5 | NA |
| KJ627686 RSVA NA M 7M 2001-- USA TN        | GA5 | NA |
| KJ627687 RSVA NA M 7M 2001-- USA TN        | GA5 | NA |
| KJ627685 RSVA NA M 7M 2001-- USA TN        | GA5 | NA |
| KJ627683 RSVA NA F 6M 2001-- USA TN        | GA5 | NA |
| KJ627684 RSVA NA F 6M 2001-- USA TN        | GA5 | NA |
| KJ627682 RSVA NA F 6M 2001-- USA TN        | GA5 | NA |
| KJ627678 RSVA NA F 0.8M 2001-- USA TN      | GA5 | NA |
| KJ627679 RSVA NA F 0.8M 2001-- USA TN      | GA5 | NA |
| KM360090 RSVA NA NA NA 2001-- USA TN       | GA5 | NA |
| JX069802 RSVA NA M NA 1998-12-12 USA TN    | GA5 | NA |
| JX069803 RSVA NA M NA 2000-03-04 USA TN    | GA5 | NA |
| JX015485 RSVA GA5 NA NA 2005-01-04 NLD NLD | GA5 | NA |
| JX015488 RSVA GA5 NA NA 2006-01-09 NLD NLD | GA5 | NA |
| KJ627656 RSVA NA F 0.3M 2003-- USA TN      | GA5 | NA |
| KF530260 RSVA NA NA NA 2005-06-21 ARG ARG  | GA5 | NA |
| KF826854 RSVA NA M 9Y 2009-02-26 ITA ITA   | GA5 | NA |
| KJ939948 RSVA NA NA NA 2010-07-22 VNM VNM  | GA5 | NA |
| KJ939954 RSVA NA NA NA 2010-04-20 VNM VNM  | GA5 | NA |
| KJ939943 RSVA NA NA NA 2010-06-10 VNM VNM  | GA5 | NA |
| KF826847 RSVA NA NA NA 2007-- AUS AUS      | GA5 | NA |
| JQ901455 RSVA GA5 NA NA 2002-06-29 NLD NLD | GA5 | NA |
| KJ627690 RSVA NA F 1M 2001-- USA TN        | GA5 | NA |
| JQ901454 RSVA GA5 NA NA 2002-01-04 NLD NLD | GA5 | NA |
| KP258727 RSVA NA M 1M 1997-- USA NY        | GA5 | NA |
| KU316180 RSVA NA F 2Y 1998-- USA NY        | GA5 | NA |
| KF826823 RSVA NA F 6M 1998-10-17 USA WI    | GA5 | NA |
| KF826824 RSVA NA F 6M 1998-10-28 USA WI    | GA5 | NA |
| KP258707 RSVA NA F 20M 1995-- USA NY       | GA5 | NA |
| KU316170 RSVA NA F 4M 1995-- USA NY        | GA5 | NA |
| KU316096 RSVA NA M 5M 1996-- USA NY        | GA5 | NA |
| KU316145 RSVA NA F 4M 1996-- USA NY        | GA5 | NA |
| KP258703 RSVA NA M 2.5M 1997-- USA NY      | GA5 | NA |
| KP258726 RSVA NA M 13M 1996-- USA NY       | GA5 | NA |
| KU316176 RSVA NA F 5W 1990-- USA NY        | GA5 | NA |
| KJ723487 RSVA NA F 46W 1993-- USA NY       | GA5 | NA |

|                                       |     |    |
|---------------------------------------|-----|----|
| KP258740 RSVA NA F 5Y 1993-- USA NY   | GA5 | NA |
| KU316161 RSVA NA F 51D 1993-- USA NY  | GA5 | NA |
| KP258722 RSVA NA F 11M 1993-- USA NY  | GA5 | NA |
| KP258710 RSVA NA M 6Y 1991-- USA NY   | GA5 | NA |
| KP258732 RSVA NA F 18M 1991-- USA NY  | GA5 | NA |
| KP258728 RSVA NA F 9M 1992-- USA NY   | GA5 | NA |
| KU316104 RSVA NA F 9M 1991-- USA NY   | GA5 | NA |
| KJ723490 RSVA NA F 7W 1992-- USA NY   | GA5 | NA |
| KJ723465 RSVA NA F 8W 1992-- USA NY   | GA5 | NA |
| KP258711 RSVA NA M 18Y 1992-- USA NY  | GA5 | NA |
| KP258701 RSVA NA M 18M 1994-- USA NY  | GA5 | NA |
| KJ723473 RSVA NA F 4W 1990-- USA NY   | GA5 | NA |
| KJ627695 RSVA NA F 2M 2001-- USA TN   | GA5 | NA |
| KJ627696 RSVA NA F 2M 2001-- USA TN   | GA5 | NA |
| KJ723462 RSVA NA M 6W 1992-- USA NY   | GA5 | NA |
| KU316121 RSVA NA F 4M 1992-- USA NY   | GA5 | NA |
| KP258699 RSVA NA F 5M 1985-- USA NY   | GA5 | NA |
| KU316133 RSVA NA F 6M 1990-- USA NY   | GA5 | NA |
| KP258709 RSVA NA F 2Y 1981-- USA NY   | GA5 | NA |
| KU316135 RSVA NA F 8W 1981-- USA NY   | GA5 | NA |
| KJ723488 RSVA NA F 4W 1981-- USA NY   | GA5 | NA |
| KP856967 RSVA NA F 1Y 1981-- USA NY   | GA5 | NA |
| KP258725 RSVA NA M 16M 1980-- USA NY  | GA5 | NA |
| KU316093 RSVA NA M 8M 1988-- USA NY   | GA5 | NA |
| KJ723468 RSVA NA F 113W 1988-- USA NY | GA5 | NA |
| KP258715 RSVA NA M 2Y 1988-- USA NY   | GA5 | NA |
| KP258696 RSVA NA M 22M 1986-- USA NY  | GA5 | NA |
| KU316150 RSVA NA M 5M 1978-- USA NY   | GA5 | NA |
| KP258704 RSVA NA F 2.6M 1994-- USA NY | GA5 | NA |
| KU316157 RSVA NA F 9W 1979-- USA NY   | GA5 | NA |
| KU316149 RSVA NA M 5M 1977-- USA NY   | GA5 | NA |
| KU316137 RSVA NA F 3Y 1979-- USA NY   | GA5 | NA |
| KU316178 RSVA NA F 12M 1979-- USA NY  | GA5 | NA |
| KP856969 RSVA NA F 1Y 1979-- USA NY   | GA5 | NA |
| KU316143 RSVA NA F 9M 1982-- USA NY   | GA5 | NA |
| KP258695 RSVA NA F 4M 1988-- USA NY   | GA1 | NA |
| KP258730 RSVA NA F 4Y 1987-- USA NY   | GA1 | NA |
| KU316153 RSVA NA F 6M 1988-- USA NY   | GA1 | NA |
| KU316165 RSVA NA M 5W 1987-- USA NY   | GA1 | NA |
| KP258719 RSVA NA F 3Y 1988-- USA NY   | GA1 | NA |

|                                            |         |    |
|--------------------------------------------|---------|----|
| KU316162 RSVA NA F 22M 1988-- USA NY       | GA1     | NA |
| KJ723491 RSVA NA F 13W 1988-- USA NY       | GA1     | NA |
| KP258729 RSVA NA M 1Y 1990-- USA NY        | GA1     | NA |
| KP258741 RSVA NA M 5M 1990-- USA NY        | GA1     | NA |
| KU316099 RSVA NA M 57D 1997-- USA NY       | GA1     | NA |
| KU316123 RSVA NA M 2M 1997-- USA NY        | GA1     | NA |
| KP258744 RSVA NA F 2Y 1995-- USA NY        | GA1     | NA |
| KU316164 RSVA NA M 4M 1995-- USA NY        | GA1     | NA |
| KU316107 RSVA NA F 3Y 1995-- USA NY        | GA1     | NA |
| KP258717 RSVA NA F 9M 1994-- USA NY        | GA1     | NA |
| KU316174 RSVA NA M 8W 1987-- USA NY        | GA1     | NA |
| KU316109 RSVA NA F 2M 1992-- USA NY        | GA1     | NA |
| KU316124 RSVA NA M 28D 1992-- USA NY       | GA1     | NA |
| KU316119 RSVA NA M 5Y 1989-- USA NY        | GA1     | NA |
| KJ723489 RSVA NA M 29W 1990-- USA NY       | GA1     | NA |
| KJ723474 RSVA NA F 8W 1989-- USA NY        | GA1     | NA |
| KU316169 RSVA NA M 3M 1985-- USA NY        | GA1     | NA |
| KU316152 RSVA NA F 6M 1985-- USA NY        | GA1     | NA |
| KU316154 RSVA NA M 2Y 1985-- USA NY        | GA1     | NA |
| KJ723461 RSVA NA M 2W 1986-- USA NY        | GA1     | NA |
| KJ723475 RSVA NA F 12W 1986-- USA NY       | GA1     | NA |
| KU316120 RSVA NA M 3M 1985-- USA NY        | GA1     | NA |
| KJ723467 RSVA NA M 14W 1986-- USA NY       | GA1     | NA |
| KU316160 RSVA NA F 6M 1986-- USA NY        | GA1     | NA |
| KU316146 RSVA NA M 16M 1983-- USA NY       | GA1     | NA |
| KJ723478 RSVA NA F 4W 1982-- USA NY        | GA1     | NA |
| KU316103 RSVA NA F 2Y 1983-- USA NY        | GA1     | NA |
| KU316140 RSVA NA F 6W 1978-- USA NY        | GA1     | NA |
| KU316106 RSVA NA F 13W 1977-- USA NY       | GA1     | NA |
| KU316168 RSVA NA F 3M 1977-- USA NY        | GA1     | NA |
| KU316155 RSVA NA F 6W 1978-- USA NY        | GA1     | NA |
| KU316112 RSVA NA F 8Y 1980-- USA NY        | GA1     | NA |
| KU316171 RSVA NA F 11M 1977-- USA NY       | GA1     | NA |
| KU950471_RSVA_NA_NA_NA_2013-08-02_USA_USA_ | BA-like | NA |
| KU950684_RSVA_NA_NA_NA_2013-08-23_USA_USA_ | BA-like | NA |
| KU950591_RSVA_NA_NA_NA_2013-10-01_USA_USA_ | BA-like | NA |
| KU950495_RSVA_NA_NA_NA_2013-07-15_USA_USA_ | BA-like | NA |
| KU839623_RSVA_NA_NA_NA_2013-11-18_USA_TN_  | BA-like | NA |
| KU950481_RSVA_NA_NA_NA_2013-10-01_USA_USA_ | BA-like | NA |
| KU950553_RSVA_NA_NA_NA_2013-08-12_USA_USA_ | BA-like | NA |

|                                            |         |    |
|--------------------------------------------|---------|----|
| KU950687_RSVB_NA_NA_NA_2013-10-23_USA_USA_ | BA-like | NA |
| KU950593_RSVB_NA_NA_NA_2014-01-09_USA_USA_ | BA-like | NA |
| KU950580_RSVB_NA_NA_NA_2013-10-07_USA_USA_ | BA-like | NA |
| KU839629_RSVB_NA_NA_NA_2013-12-27_USA_TN_  | BA-like | NA |
| KU950532_RSVB_NA_NA_NA_2013-10-07_USA_USA_ | BA-like | NA |
| KU950463_RSVB_NA_NA_NA_2013-11-26_USA_USA_ | BA-like | NA |
| KU839628_RSVB_NA_NA_NA_2013-11-27_USA_TN_  | BA-like | NA |
| KU950675_RSVB_NA_NA_NA_2013-06-21_USA_USA_ | BA-like | NA |
| KU950676_RSVB_NA_NA_NA_2014-01-09_USA_USA_ | BA-like | NA |
| KU950582_RSVB_NA_NA_NA_2013-07-17_USA_USA_ | BA-like | NA |
| KU950534_RSVB_NA_NA_NA_2014-01-15_USA_USA_ | BA-like | NA |
| KU839634_RSVB_NA_NA_NA_2013-11-15_USA_TN_  | BA-like | NA |
| KU950681_RSVB_NA_NA_NA_2013-12-05_USA_USA_ | BA-like | NA |
| KU950678_RSVB_NA_NA_NA_2013-08-23_USA_USA_ | BA-like | NA |
| KU950482_RSVB_NA_NA_NA_2013-08-05_USA_USA_ | BA-like | NA |
| KU950565_RSVB_NA_NA_NA_2013-08-16_USA_USA_ | BA-like | NA |
| KU950462_RSVB_NA_NA_NA_2013-08-26_USA_USA_ | BA-like | NA |
| KU950512_RSVB_NA_NA_NA_2013-07-10_USA_USA_ | BA-like | NA |
| KU950525_RSVB_NA_NA_NA_2014-03-20_USA_USA_ | BA-like | NA |
| KU950559_RSVB_NA_NA_NA_2013-07-22_USA_USA_ | BA-like | NA |
| KU950577_RSVB_NA_NA_NA_2013-11-19_USA_USA_ | BA-like | NA |
| KU950659_RSVB_NA_NA_NA_2013-11-20_USA_USA_ | BA-like | NA |
| KU950516_RSVB_NA_NA_NA_2013-08-15_USA_USA_ | BA-like | NA |
| KU950466_RSVB_NA_NA_NA_2013-10-17_USA_USA_ | BA-like | NA |
| KU839640_RSVB_NA_NA_NA_2013-12-11_USA_TN_  | BA-like | NA |
| KU950515_RSVB_NA_NA_NA_2013-10-14_USA_USA_ | BA-like | NA |
| KU950476_RSVB_NA_NA_NA_2013-10-08_USA_USA_ | BA-like | NA |
| KU950691_RSVB_NA_NA_NA_2013-06-19_USA_USA_ | BA-like | NA |
| KU950695_RSVB_NA_NA_NA_2013-07-30_USA_USA_ | BA-like | NA |
| KU839635_RSVB_NA_NA_NA_2013-12-02_USA_TN_  | BA-like | NA |
| KU950504_RSVB_NA_NA_NA_2013-06-18_USA_USA_ | BA-like | NA |
| KU950589_RSVB_NA_NA_NA_2013-10-29_USA_USA_ | BA-like | NA |
| KU950605_RSVB_NA_NA_NA_2013-08-13_USA_USA_ | BA-like | NA |
| KU950656_RSVB_NA_NA_NA_2013-09-16_USA_USA_ | BA-like | NA |
| KU839627_RSVB_NA_NA_NA_2014-01-29_USA_TN_  | BA-like | NA |
| KU950568_RSVB_NA_NA_NA_2014-01-07_USA_USA_ | BA-like | NA |
| KU950517_RSVB_NA_NA_NA_2013-10-22_USA_USA_ | BA-like | NA |
| KU950690_RSVB_NA_NA_NA_2013-08-14_USA_USA_ | BA-like | NA |
| KU839632_RSVB_NA_NA_NA_2013-12-17_USA_TN_  | BA-like | NA |
| KU950510_RSVB_NA_NA_NA_2013-09-25_USA_USA_ | BA-like | NA |

|                                              |         |    |
|----------------------------------------------|---------|----|
| KU950503_RSVB_NA_NA_NA_2013-11-15_USA_USA_   | BA-like | NA |
| KU950648_RSVB_NA_NA_NA_2014-01-27_USA_USA_   | BA-like | NA |
| KU950672_RSVB_NA_NA_NA_2013-12-09_USA_USA_   | BA-like | NA |
| KU950697_RSVB_NA_NA_NA_2013-12-16_USA_USA_   | BA-like | NA |
| KU950688_RSVB_NA_NA_NA_2013-08-28_USA_USA_   | BA-like | NA |
| KU950562_RSVB_NA_NA_NA_2013-09-23_USA_USA_   | BA-like | NA |
| KU950665_RSVB_NA_NA_NA_2013-11-22_USA_USA_   | BA-like | NA |
| KU950514_RSVB_NA_NA_NA_2013-11-21_USA_USA_   | BA-like | NA |
| KU839641_RSVB_NA_NA_NA_2014-01-20_USA_TN_    | BA-like | NA |
| KU950465_RSVB_NA_NA_NA_2013-11-19_USA_USA_   | BA-like | NA |
| KU950497_RSVB_NA_NA_NA_2013-08-20_USA_USA_   | BA-like | NA |
| KU950630_RSVB_NA_NA_NA_2013-07-05_USA_USA_   | BA-like | NA |
| KU950668_RSVB_NA_NA_NA_2013-09-30_USA_USA_   | BA-like | NA |
| KU950679_RSVB_NA_NA_NA_2013-07-12_USA_USA_   | BA-like | NA |
| KU950555_RSVB_NA_NA_NA_2013-12-03_USA_USA_   | BA-like | NA |
| KU839638_RSVB_NA_NA_NA_2013-11-11_USA_TN_    | BA-like | NA |
| KU950663_RSVB_NA_NA_NA_2013-10-08_USA_USA_   | BA-like | NA |
| KU950599_RSVB_NA_NA_NA_2013-10-29_USA_USA_   | BA-like | NA |
| KU950601_RSVB_NA_NA_NA_2013-10-23_USA_USA_   | BA-like | NA |
| KU950622_RSVB_NA_NA_NA_2013-10-15_USA_USA_   | BA-like | NA |
| KU950478_RSVB_NA_NA_NA_2013-06-20_USA_USA_   | BA-like | NA |
| KU950539_RSVB_NA_NA_NA_2013-09-25_USA_USA_   | BA-like | NA |
| KU950543_RSVB_NA_NA_NA_2013-10-16_USA_USA_   | BA-like | NA |
| KU950606_RSVB_NA_NA_NA_2013-12-13_USA_USA_   | BA-like | NA |
| KU950689_RSVB_NA_NA_NA_2013-10-31_USA_USA_   | BA-like | NA |
| KU950526_RSVB_NA_NA_NA_2013-11-27_USA_USA_   | BA-like | NA |
| KU950535_RSVB_NA_NA_NA_2013-06-25_USA_USA_   | BA-like | NA |
| KU950496_RSVB_NA_NA_NA_2013-12-02_USA_USA_   | BA-like | NA |
| KU950578_RSVB_NA_NA_NA_2013-10-23_USA_USA_   | BA-like | NA |
| KU950494_RSVB_NA_NA_NA_2013-12-03_USA_USA_   | BA-like | NA |
| KU950530_RSVB_NA_NA_NA_2014-01-21_USA_USA_   | BA-like | NA |
| KU950477_RSVB_NA_NA_NA_2014-01-27_USA_USA_   | BA-like | NA |
| KU950552_RSVB_NA_NA_NA_2013-12-27_USA_USA_   | BA-like | NA |
| KU950613_RSVB_NA_NA_NA_2013-09-27_USA_USA_   | BA-like | NA |
| KU950618_RSVB_NA_NA_NA_2012-10-17_USA_USA_   | BA-like | NA |
| JX576734_RSVB_GB13_NA_NA_2012-01-29_NLD_NLD_ | BA-like | NA |
| JX576736_RSVB_GB13_NA_NA_2012-01-07_NLD_NLD_ | BA-like | NA |
| 61945_RSVB_NA_NA_NA_2013-01-06_JOR_Amman_    | BA-like | 5  |
| 62012_RSVB_NA_NA_NA_2011-02-13_JOR_Amman_    | BA-like | 5  |
| 62009_RSVB_NA_NA_NA_2013-03-17_JOR_Amman_    | BA-like | 14 |

|                                              |         |    |
|----------------------------------------------|---------|----|
| 61948_RSVB_NA_NA_NA_2013-02-10_JOR_Amman_    | BA-like | 9  |
| 61949_RSVB_NA_NA_NA_2013-02-11_JOR_Amman_    | BA-like | 9  |
| 61940_RSVB_NA_NA_NA_2013-02-20_JOR_Amman_    | BA-like | 9  |
| 61942_RSVB_NA_NA_NA_2012-12-30_JOR_Amman_    | BA-like | 9  |
| 61941_RSVB_NA_NA_NA_2013-03-03_JOR_Amman_    | BA-like | 9  |
| 61950_RSVB_NA_NA_NA_2013-02-14_JOR_Amman_    | BA-like | 9  |
| 61938_RSVB_NA_NA_NA_2013-02-21_JOR_Amman_    | BA-like | 9  |
| 62008_RSVB_NA_NA_NA_2013-03-27_JOR_Amman_    | BA-like | 9  |
| 61953_RSVB_NA_NA_NA_2013-01-17_JOR_Amman_    | BA-like | 9  |
| KU950488_RSVB_NA_NA_NA_2014-01-25_USA_USA_   | BA-like | NA |
| JX576735_RSVB_GB13_NA_NA_2012-01-23_NLD_NLD_ | BA-like | NA |
| KU950669_RSVB_NA_NA_NA_2013-07-09_USA_USA_   | BA-like | NA |
| 61967_RSVB_NA_NA_NA_2010-03-24_JOR_Amman_    | BA-like | 1  |
| KU950621_RSVB_NA_NA_NA_2014-02-05_USA_USA_   | BA-like | NA |
| KU950558_RSVB_NA_NA_NA_2014-01-08_USA_USA_   | BA-like | NA |
| KU950461_RSVB_NA_NA_NA_2013-12-17_USA_USA_   | BA-like | NA |
| 61939_RSVB_NA_NA_NA_2013-02-26_JOR_Amman_    | BA-like | 13 |
| KU950533_RSVB_NA_NA_NA_2014-01-10_USA_USA_   | BA-like | NA |
| KU839633_RSVB_NA_NA_NA_2014-01-13_USA_TN_    | BA-like | NA |
| KU950542_RSVB_NA_NA_NA_2013-10-07_USA_USA_   | BA-like | NA |
| KU950588_RSVB_NA_NA_NA_2014-01-22_USA_USA_   | BA-like | NA |
| KU950508_RSVB_NA_NA_NA_2013-07-30_USA_USA_   | BA-like | NA |
| KU950547_RSVB_NA_NA_NA_2013-11-19_USA_USA_   | BA-like | NA |
| KU950548_RSVB_NA_NA_NA_2014-01-24_USA_USA_   | BA-like | NA |
| KU950571_RSVB_NA_NA_NA_2012-12-19_USA_USA_   | BA-like | NA |
| KJ672476_RSVB_NA_F_3M_2013-01-04_USA_TN_     | BA-like | NA |
| KU950586_RSVB_NA_NA_NA_2013-01-09_USA_USA_   | BA-like | NA |
| KU950633_RSVB_NA_NA_NA_2013-12-10_USA_USA_   | BA-like | NA |
| JX576741_RSVB_GB13_NA_NA_2009-12-22_NLD_NLD_ | BA-like | NA |
| 61964_RSVB_NA_NA_NA_2010-03-21_JOR_Amman_    | BA-like | NA |
| KJ627262_RSVB_NA_M_1Y_2012-03-14_PER_PER_    | BA-like | NA |
| KJ627342_RSVB_NA_F_4M_2012-02-23_PER_PER_    | BA-like | NA |
| KJ627340_RSVB_NA_F_4M_2012-02-28_PER_PER_    | BA-like | NA |
| JX576737_RSVB_GB13_NA_NA_2010-12-21_NLD_NLD_ | BA-like | NA |
| JX576733_RSVB_GB13_NA_NA_2012-02-05_NLD_NLD_ | BA-like | NA |
| KF826858_RSVB_NA_F_2M_2009-03-04_ITA_ITA_    | BA-like | NA |
| KP317928_RSVB_NA_NA_NA_2011-07-08_KEN_KEN_   | BA-like | NA |
| KJ939923_RSVB_NA_NA_NA_2009-10-07_VNM_VNM_   | BA-like | NA |
| KJ939927_RSVB_NA_NA_NA_2010-05-27_VNM_VNM_   | BA-like | NA |
| KJ939934_RSVB_NA_NA_NA_2010-09-08_VNM_VNM_   | BA-like | NA |

|                                              |         |    |
|----------------------------------------------|---------|----|
| KJ939921_RSVB_NA_NA_NA_2009-08-31_VNM_VNM_   | BA-like | NA |
| KJ939925_RSVB_NA_NA_NA_2009-11-18_VNM_VNM_   | BA-like | NA |
| KJ939931_RSVB_NA_NA_NA_2009-11-10_VNM_VNM_   | BA-like | NA |
| KJ939924_RSVB_NA_NA_NA_2009-10-23_VNM_VNM_   | BA-like | NA |
| 61956_RSVB_NA_NA_NA_2012-12-19_JOR_Amman_    | BA-like | 7  |
| 62010_RSVB_NA_NA_NA_2013-03-13_JOR_Amman_    | BA-like | 7  |
| KR350475_RSVB_NA_NA_NA_2014-11-21_MEX_MEX_   | BA-like | NA |
| KU950584_RSVB_NA_NA_NA_2013-10-31_USA_USA_   | BA-like | NA |
| KJ939928_RSVB_NA_NA_NA_2010-06-17_VNM_VNM_   | BA-like | NA |
| JX576738_RSVB_GB13_NA_NA_2010-12-12_NLD_NLD_ | BA-like | NA |
| JX576745_RSVB_GB13_NA_NA_2008-12-17_NLD_NLD_ | BA-like | NA |
| JX576732_RSVB_GB13_NA_NA_2006-12-05_BEL_BEL_ | BA-like | NA |
| 61931_RSVB_NA_NA_NA_2011-01-31_JOR_Amman_    | BA-like | 4  |
| 61992_RSVB_NA_NA_NA_2012-04-05_JOR_Amman_    | BA-like | 4  |
| KU950587_RSVB_NA_NA_NA_2013-11-13_USA_USA_   | BA-like | NA |
| KU950604_RSVB_NA_NA_NA_2013-06-19_USA_USA_   | BA-like | NA |
| KU950635_RSVB_NA_NA_NA_2013-11-18_USA_USA_   | BA-like | NA |
| KU950637_RSVB_NA_NA_NA_2014-02-04_USA_USA_   | BA-like | NA |
| 61958_RSVB_NA_NA_NA_2013-02-05_JOR_Amman_    | BA-like | 12 |
| KU839625_RSVB_NA_NA_NA_2014-01-02_USA_TN_    | BA-like | NA |
| KU950607_RSVB_NA_NA_NA_2013-12-06_USA_USA_   | BA-like | NA |
| 61952_RSVB_NA_NA_NA_2013-01-15_JOR_Amman_    | BA-like | 10 |
| 62006_RSVB_NA_NA_NA_2013-03-13_JOR_Amman_    | BA-like | 10 |
| KU950467_RSVB_NA_NA_NA_2014-01-15_USA_USA_   | BA-like | NA |
| KU950611_RSVB_NA_NA_NA_2013-10-14_USA_USA_   | BA-like | NA |
| KU950682_RSVB_NA_NA_NA_2012-08-15_USA_USA_   | BA-like | NA |
| KP663730_RSVB_NA_NA_NA_2014-01-13_KOR_KOR_   | BA-like | NA |
| KM517573_RSVB_NA_NA_NA_2013-07-30_CHN_GZ_    | BA-like | NA |
| KP663729_RSVB_NA_NA_NA_2014-01-14_KOR_KOR_   | BA-like | NA |
| KU950603_RSVB_NA_NA_NA_2013-09-19_USA_USA_   | BA-like | NA |
| 61959_RSVB_NA_NA_NA_2013-01-31_JOR_Amman_    | BA-like | 11 |
| 61957_RSVB_NA_NA_NA_2012-12-27_JOR_Amman_    | BA-like | 8  |
| KJ939929_RSVB_NA_NA_NA_2010-07-07_VNM_VNM_   | BA-like | NA |
| JX576749_RSVB_GB13_NA_NA_2007-11-23_NLD_NLD_ | BA-like | NA |
| JX576740_RSVB_GB13_NA_NA_2009-12-28_NLD_NLD_ | BA-like | NA |
| JX576743_RSVB_GB13_NA_NA_2009-12-18_NLD_NLD_ | BA-like | NA |
| KU950458_RSVB_NA_NA_NA_2013-12-16_USA_USA_   | BA-like | NA |
| KU950569_RSVB_NA_NA_NA_2013-03-04_USA_USA_   | BA-like | NA |
| KJ627359_RSVB_NA_M_9M_2011-04-13_PER_PER_    | BA-like | NA |
| KJ939920_RSVB_NA_NA_NA_2009-08-17_VNM_VNM_   | BA-like | NA |

|                                              |         |    |
|----------------------------------------------|---------|----|
| KF826851_RSVB_NA_NA_NA_2007_USA_WI_          | BA-like | NA |
| KJ627364_RSVB_NA_F_10M_2011-05-12_PER_PER_   | BA-like | NA |
| KJ627254_RSVB_NA_M_1Y_2011-06-13_PER_PER_    | BA-like | NA |
| KF826857_RSVB_NA_M_4M_2009-02-18_ITA_ITA_    | BA-like | NA |
| KJ627348_RSVB_NA_F_1Y_2011-06-02_PER_PER_    | BA-like | NA |
| JX576744_RSVB_GB13_NA_NA_2008-12-22_NLD_NLD_ | BA-like | NA |
| JX576748_RSVB_GB13_NA_NA_2007-11-27_NLD_NLD_ | BA-like | NA |
| KJ627278_RSVB_NA_M_5M_2010-03-10_PER_PER_    | BA-like | NA |
| KJ627341_RSVB_NA_M_7M_2011-04-04_PER_PER_    | BA-like | NA |
| KJ627330_RSVB_NA_F_1Y_2008-07-15_PER_PER_    | BA-like | NA |
| JX576747_RSVB_GB13_NA_NA_2008-12-12_NLD_NLD_ | BA-like | NA |
| KF826820_RSVB_NA_M_1M_2009-03-31_ITA_ITA_    | BA-like | NA |
| KF826860_RSVB_NA_F_10M_2009-04-28_ITA_ITA_   | BA-like | NA |
| KF826859_RSVB_NA_M_3M_2009-03-05_ITA_ITA_    | BA-like | NA |
| JX576730_RSVB_GB13_NA_NA_2008-10-24_BEL_BEL_ | BA-like | NA |
| JX576729_RSVB_GB13_NA_NA_2008-10-23_BEL_BEL_ | BA-like | NA |
| JX576731_RSVB_GB13_NA_NA_2008-11-19_BEL_BEL_ | BA-like | NA |
| JX576746_RSVB_GB13_NA_NA_2008-12-15_NLD_NLD_ | BA-like | NA |
| KF826822_RSVB_NA_NA_NA_2007_USA_WI_          | BA-like | NA |
| JX576751_RSVB_GB13_NA_NA_2007-01-05_NLD_NLD_ | BA-like | NA |
| JX576753_RSVB_GB13_NA_NA_2006-11-17_NLD_NLD_ | BA-like | NA |
| JN032120_RSVB_NA_NA_NA_2010-01-21_USA_WI_    | BA-like | NA |
| KJ627285_RSVB_NA_F_8M_2011-06-09_PER_PER_    | BA-like | NA |
| KP317927_RSVB_NA_NA_NA_2011-02-01_KEN_KEN_   | BA-like | NA |
| KP317945_RSVB_NA_NA_NA_2011-04-14_KEN_KEN_   | BA-like | NA |
| KP317934_RSVB_NA_NA_NA_2012-02-13_KEN_KEN_   | BA-like | NA |
| KP317952_RSVB_NA_NA_NA_2010-05-09_KEN_KEN_   | BA-like | NA |
| KP317917_RSVB_NA_NA_NA_2006-01-27_KEN_KEN_   | BA-like | NA |
| KP317932_RSVB_NA_NA_NA_2010-04-06_KEN_KEN_   | BA-like | NA |
| KP317941_RSVB_NA_NA_NA_2010-02-13_KEN_KEN_   | BA-like | NA |
| JX576756_RSVB_GB13_NA_NA_2005-12-20_NLD_NLD_ | BA-like | NA |
| KF826842_RSVB_NA_NA_NA_2007-05-22_ARG_ARG_   | BA-like | NA |
| KF530259_RSVB_NA_NA_NA_2006_ZAF_ZAF_         | BA-like | NA |
| KJ627280_RSVB_NA_F_1Y_2008-02-11_PER_PER_    | BA-like | NA |
| KJ627317_RSVB_NA_M_9M_2007-01-29_PER_PER_    | BA-like | NA |
| KJ627310_RSVB_NA_F_2Y_2007-01-31_PER_PER_    | BA-like | NA |
| KJ627299_RSVB_NA_F_1Y_2007-11-24_PER_PER_    | BA-like | NA |
| JX576750_RSVB_GB13_NA_NA_2007-03-14_NLD_NLD_ | BA-like | NA |
| KJ939930_RSVB_NA_NA_NA_2009-10-26_VNM_VNM_   | BA-like | NA |
| JX576752_RSVB_GB13_NA_NA_2006-12-21_NLD_NLD_ | BA-like | NA |



|                                              |         |    |
|----------------------------------------------|---------|----|
| JX576757_RSVB_GB13_NA_NA_2005-01-14_NLD_NLD_ | BA-like | NA |
| KP317925_RSVB_NA_NA_NA_2004-12-22_KEN_KEN_   | BA-like | NA |
| KU950574_RSVB_NA_NA_NA_2005-12-03_USA_USA_   | BA-like | NA |
| KU950614_RSVB_NA_NA_NA_2005-12-29_USA_USA_   | BA-like | NA |
| KU950457_RSVB_NA_NA_NA_2005-12-30_USA_USA_   | BA-like | NA |
| JX576754_RSVB_GB13_NA_NA_2005-12-31_NLD_NLD_ | BA-like | NA |
| KJ627302_RSVB_NA_F_9M_2008-04-12_PER_PER_    | BA-like | NA |
| KF826839_RSVB_NA_NA_NA_2006-07-25_ARG_ARG_   | BA-like | NA |
| JX576759_RSVB_GB13_NA_NA_2003-12-05_NLD_NLD_ | BA-like | NA |
| JX576755_RSVB_GB13_NA_NA_2005-12-26_NLD_NLD_ | BA-like | NA |
| KJ672425_RSVB_NA_M_4M_2013-01-28_USA_TN_     | BA-like | NA |
| KU950500_RSVB_NA_NA_NA_2012-12-18_USA_USA_   | BA-like | NA |
| KU950576_RSVB_NA_NA_NA_2012-11-02_USA_USA_   | BA-like | NA |
| KM042393_RSVB_NA_NA_NA_2012-11-26_USA_TN_    | BA-like | NA |
| KU950619_RSVB_NA_NA_NA_2012-08-27_USA_USA_   | BA-like | NA |
| KJ672438_RSVB_NA_F_3M_2013-01-21_USA_TN_     | BA-like | NA |
| KJ672430_RSVB_NA_M_3M_2013-01-18_USA_TN_     | BA-like | NA |
| KJ672481_RSVB_NA_F_4M_2013-02-26_USA_TN_     | BA-like | NA |
| KU950693_RSVB_NA_NA_NA_2012-10-16_USA_USA_   | BA-like | NA |
| KU839636_RSVB_NA_NA_NA_2013-12-27_USA_TN_    | BA-like | NA |
| KU950484_RSVB_NA_NA_NA_2013-12-09_USA_USA_   | BA-like | NA |
| KU950625_RSVB_NA_NA_NA_2014-01-14_USA_USA_   | BA-like | NA |
| KU950489_RSVB_NA_NA_NA_2013-06-24_USA_USA_   | BA-like | NA |
| KU950647_RSVB_NA_NA_NA_2012-12-04_USA_USA_   | BA-like | NA |
| KU950662_RSVB_NA_NA_NA_2012-12-14_USA_USA_   | BA-like | NA |
| KU950602_RSVB_NA_NA_NA_2013-11-27_USA_USA_   | BA-like | NA |
| 62003_RSVB_NA_NA_NA_2012-04-24_JOR_Amman_    | BA-like | 6  |
| 61966_RSVB_NA_NA_NA_2010-03-31_JOR_Amman_    | BA-like | 2  |
| KJ939926_RSVB_NA_NA_NA_2010-05-05_VNM_VNM_   | BA-like | NA |
| JX576739_RSVB_GB13_NA_NA_2009-12-28_NLD_NLD_ | BA-like | NA |
| KU950657_RSVB_NA_NA_NA_2012-08-29_USA_USA_   | BA-like | NA |
| KF826845_RSVB_NA_NA_NA_2008-06-10_ARG_ARG_   | BA-like | NA |
| KF826843_RSVB_NA_M_8M_2008-09-07_MEX_MEX_    | BA-like | NA |
| KF826844_RSVB_NA_M_5M_2008-10-19_MEX_MEX_    | BA-like | NA |
| JX576742_RSVB_GB13_NA_NA_2009-12-20_NLD_NLD_ | BA-like | NA |
| KJ627247_RSVB_NA_M_11M_2011-06-03_PER_PER_   | BA-like | NA |
| KJ627332_RSVB_NA_F_8M_2011-06-13_PER_PER_    | BA-like | NA |
| KJ627277_RSVB_NA_M_1Y_2011-05-19_PER_PER_    | BA-like | NA |
| 61981_RSVB_NA_NA_NA_2010-06-27_JOR_Amman_    | BA-like | 3  |
| JX576761_RSVB_GB13_NA_NA_2002-10-21_NLD_NLD_ | BA-like | NA |

|                                              |             |    |
|----------------------------------------------|-------------|----|
| KF826825_RSVB_NA_F_5M_2004-10-18_MEX_MEX_    | BA-like     | NA |
| KJ939919_RSVB_NA_NA_NA_2009-07-30_VNM_VNM_   | BA-like     | NA |
| KJ939922_RSVB_NA_NA_NA_2009-09-24_VNM_VNM_   | BA-like     | NA |
| JX576758_RSVB_GB13_NA_NA_2005-12-14_NLD_NLD_ | BA-like     | NA |
| JX576762_RSVB_GB13_NA_NA_2002-01-08_NLD_NLD_ | BA-like     | NA |
| KF826829_RSVB_NA_F_30M_2005-12-13_MEX_MEX_   | BA-like     | NA |
| JQ582844_RSVB_NA_NA_NA_2002_USA_USA_         | BA-like     | NA |
| JQ582843_RSVB_NA_NA_NA_2002_USA_USA_         | Non BA-like | NA |
| JX576760_RSVB_GB12_NA_NA_2003-01-01_NLD_NLD_ | Non BA-like | NA |
| KP258724_RSVB_NA_NA_NA_1997_USA_NY_          | Non BA-like | NA |
| KU316172_RSVB_NA_NA_NA_1997_USA_NY_          | Non BA-like | NA |
| KP856966_RSVB_NA_NA_NA_1998_USA_NY_          | Non BA-like | NA |
| KU316100_RSVB_NA_NA_NA_1994_USA_NY_          | Non BA-like | NA |
| KU316105_RSVB_NA_NA_NA_1998_USA_NY_          | Non BA-like | NA |
| KU316158_RSVB_NA_NA_NA_1996_USA_NY_          | Non BA-like | NA |
| KP258742_RSVB_NA_NA_NA_1994_USA_NY_          | Non BA-like | NA |
| KU316134_RSVB_NA_NA_NA_1994_USA_NY_          | Non BA-like | NA |
| KP258739_RSVB_NA_NA_NA_1996_USA_NY_          | Non BA-like | NA |
| KP258708_RSVB_NA_NA_NA_1996_USA_NY_          | Non BA-like | NA |
| KP258713_RSVB_NA_NA_NA_1993_USA_NY_          | Non BA-like | NA |
| KP258745_RSVB_NA_NA_NA_1992_USA_NY_          | Non BA-like | NA |
| KF826853_RSVB_NA_NA_NA_2008-02-01_DEU_DEU_   | Non BA-like | NA |
| KP317923_RSVB_NA_NA_NA_2012-03-01_KEN_KEN_   | Non BA-like | NA |
| KU316179_RSVB_NA_NA_NA_1994_USA_NY_          | Non BA-like | NA |
| KP856961_RSVB_NA_NA_NA_1989_USA_NY_          | Non BA-like | NA |
| KP856965_RSVB_NA_NA_NA_1989_USA_NY_          | Non BA-like | NA |
| KP258705_RSVB_NA_NA_NA_1995_USA_NY_          | Non BA-like | NA |
| KU316117_RSVB_NA_NA_NA_1995_USA_NY_          | Non BA-like | NA |
| KP258702_RSVB_NA_NA_NA_1994_USA_NY_          | Non BA-like | NA |
| KJ723484_RSVB_NA_M_10W_1993_USA_NY_          | Non BA-like | NA |
| KU316114_RSVB_NA_NA_NA_1993_USA_NY_          | Non BA-like | NA |
| KU316128_RSVB_NA_NA_NA_1995_USA_NY_          | Non BA-like | NA |
| KU316159_RSVB_NA_NA_NA_1997_USA_NY_          | Non BA-like | NA |
| KU316156_RSVB_NA_NA_NA_1989_USA_NY_          | Non BA-like | NA |
| KJ723466_RSVB_NA_F_5W_1993_USA_NY_           | Non BA-like | NA |
| KU316163_RSVB_NA_NA_NA_1993_USA_NY_          | Non BA-like | NA |
| KU316111_RSVB_NA_NA_NA_1992_USA_NY_          | Non BA-like | NA |
| KP258720_RSVB_NA_NA_NA_1990_USA_NY_          | Non BA-like | NA |
| KU316132_RSVB_NA_NA_NA_1991_USA_NY_          | Non BA-like | NA |
| KU316144_RSVB_NA_NA_NA_1991_USA_NY_          | Non BA-like | NA |

|                                     |             |    |
|-------------------------------------|-------------|----|
| KU316127_RSVB_NA_NA_NA_1991_USA_NY_ | Non BA-like | NA |
| KJ723480_RSVB_NA_M_9W_1991_USA_NY_  | Non BA-like | NA |
| KJ723470_RSVB_NA_M_18W_1991_USA_NY_ | Non BA-like | NA |
| KP258698_RSVB_NA_NA_NA_1991_USA_NY_ | Non BA-like | NA |
| KJ723477_RSVB_NA_M_21W_1991_USA_NY_ | Non BA-like | NA |
| KJ723460_RSVB_NA_M_5W_1991_USA_NY_  | Non BA-like | NA |
| KJ723482_RSVB_NA_M_15W_1989_USA_NY_ | Non BA-like | NA |
| KU316113_RSVB_NA_NA_NA_1989_USA_NY_ | Non BA-like | NA |
| KU316181_RSVB_NA_NA_NA_1990_USA_NY_ | Non BA-like | NA |
| KP258714_RSVB_NA_NA_NA_1986_USA_NY_ | Non BA-like | NA |
| KU316182_RSVB_NA_NA_NA_1990_USA_NY_ | Non BA-like | NA |
| KU316102_RSVB_NA_NA_NA_1982_USA_NY_ | Non BA-like | NA |
| KU316175_RSVB_NA_NA_NA_1985_USA_NY_ | Non BA-like | NA |
| KJ723481_RSVB_NA_M_8W_1985_USA_NY_  | Non BA-like | NA |
| KU316130_RSVB_NA_NA_NA_1985_USA_NY_ | Non BA-like | NA |
| KU316173_RSVB_NA_NA_NA_1984_USA_NY_ | Non BA-like | NA |
| KP258735_RSVB_NA_NA_NA_1987_USA_NY_ | Non BA-like | NA |
| KJ723463_RSVB_NA_F_5W_1987_USA_NY_  | Non BA-like | NA |
| KU316108_RSVB_NA_NA_NA_1987_USA_NY_ | Non BA-like | NA |
| KJ723469_RSVB_NA_M_18W_1987_USA_NY_ | Non BA-like | NA |
| KU316129_RSVB_NA_NA_NA_1987_USA_NY_ | Non BA-like | NA |
| KU316151_RSVB_NA_NA_NA_1986_USA_NY_ | Non BA-like | NA |
| KJ723476_RSVB_NA_M_9W_1987_USA_NY_  | Non BA-like | NA |
| KP258731_RSVB_NA_NA_NA_1982_USA_NY_ | Non BA-like | NA |
| KP258721_RSVB_NA_NA_NA_1981_USA_NY_ | Non BA-like | NA |
| KP258712_RSVB_NA_NA_NA_1979_USA_NY_ | Non BA-like | NA |
| KP258736_RSVB_NA_NA_NA_1982_USA_NY_ | Non BA-like | NA |
| KU316177_RSVB_NA_NA_NA_1982_USA_NY_ | Non BA-like | NA |
| KU316101_RSVB_NA_NA_NA_1982_USA_NY_ | Non BA-like | NA |
| KJ723479_RSVB_NA_M_5W_1983_USA_NY_  | Non BA-like | NA |
| KP258718_RSVB_NA_NA_NA_1983_USA_NY_ | Non BA-like | NA |
| KP856963_RSVB_NA_NA_NA_1980_USA_NY_ | Non BA-like | NA |
| KU316122_RSVB_NA_NA_NA_1980_USA_NY_ | Non BA-like | NA |
| KU316116_RSVB_NA_NA_NA_1977_USA_NY_ | Non BA-like | NA |
| KU316095_RSVB_NA_NA_NA_1979_USA_NY_ | Non BA-like | NA |
| KU316147_RSVB_NA_NA_NA_1979_USA_NY_ | Non BA-like | NA |
| KJ723485_RSVB_NA_F_13W_1984_USA_NY_ | Non BA-like | NA |
| KU316136_RSVB_NA_NA_NA_1987_USA_NY_ | Non BA-like | NA |
| KP258738_RSVB_NA_NA_NA_1980_USA_NY_ | Non BA-like | NA |
| KU316115_RSVB_NA_NA_NA_1980_USA_NY_ | Non BA-like | NA |
